1 **Metabolic but not transcriptional regulation by PKM2 is important for Natural**  
2 **Killer cell responses.**

3 Jessica F. Walls<sup>1,3</sup>, Jeff J. Subleski<sup>3</sup>, Erika M. Palmieri<sup>3</sup>, Marieli Gonzalez Cotto<sup>3</sup>, Clair  
4 M. Gardiner<sup>1,4</sup>, Daniel W. McVicar<sup>3,4</sup>, David K. Finlay<sup>1,2,4</sup>.

5

6 <sup>1</sup> School of Biochemistry and Immunology, Trinity Biomedical Sciences Institute, Trinity  
7 College Dublin, 152-160 Pearse Street, Dublin 2, Ireland

8 <sup>2</sup> School of Pharmacy and Pharmaceutical Sciences, Trinity Biomedical Sciences  
9 Institute, Trinity College Dublin, 152-160 Pearse Street, Dublin 2, Ireland

10 <sup>3</sup> Laboratory of Cancer Immunometabolism, National Cancer Institute, Frederick, MD,  
11 USA.

12 <sup>4</sup> Equal contributions

13

14 **Abstract**

15 Natural Killer (NK) cells have an important role in immune responses to viruses and  
16 tumours. Integrating changes in signal transduction pathways and cellular metabolism  
17 is essential for effective NK cells responses. The PKM2 isoform of the glycolytic  
18 enzyme Pyruvate Kinase Muscle has described roles in regulating glycolytic flux and  
19 signal transduction, especially gene transcription. While PKM2 expression is robustly  
20 induced in activated NK cells, mice lacking PKM2 in NK cells showed no defect in NK  
21 cell metabolism or anti-viral responses to MCMV infection. This maintenance of  
22 function is explained by compensatory PKM1 expression in PKM2-null NK cell cells  
23 demonstrating that PKM2 is not a signalling molecule in this immune cell type. To  
24 further investigate the role of PKM2 we forced the tetramerization of the protein with  
25 TEPP-46, which increases its catalytic activity while inhibiting any signalling functions

26 mediated by mono/dimeric conformations. NK cells activated with TEPP-46 had  
27 reduced effector function due to TEPP-46-induced increases in oxidative stress.  
28 Overall, PKM2-regulated glycolytic metabolism and redox status, not transcriptional  
29 control, facilitate optimal NK cells responses.

30

## 31 **Introduction**

32 Natural Killer (NK) cells are key lymphocytes for the control of viral infection and  
33 cancer immunosurveillance. Glycolysis is important for the function of Natural Killer  
34 (NK) cells as inhibition of glycolysis disrupts normal NK cell effector functions including  
35 the production of IFN $\gamma$  and the lysis of target cells <sup>1, 2, 3, 4, 5</sup>. Glucose breakdown through  
36 glycolysis provides energy, in the form of ATP, both directly and via generation of  
37 pyruvate to fuel mitochondrial oxidative phosphorylation (OXPHOS). Oxidation of  
38 glucose also produces glycolytic intermediates that feed into ancillary metabolic  
39 pathways such as the pentose phosphate pathway (PPP) to support cellular  
40 processes including biosynthesis and antioxidant activities. For instance, the glycolytic  
41 intermediate glucose-6-phosphate can feed into the PPP for the production of  
42 nucleotides and to generate NADPH, an important cofactor for cellular biosynthesis  
43 and for maintaining cellular redox control. Glycolytic intermediates and enzymes can  
44 also play a role in directly regulating immune functions. For example, in T lymphocytes  
45 the metabolite phosphoenolpyruvate can control Ca<sup>2+</sup>/NFAT signalling and the  
46 glycolytic enzyme glyceraldehyde-3 phosphate dehydrogenase (GAPDH) has a role  
47 outside of glycolysis where it can control the translation of IFN $\gamma$  and IL-2 mRNAs <sup>6, 7</sup>.  
48 Another glycolytic enzyme linked to the control of immune functions is an isoform of  
49 the final enzyme in glycolysis, pyruvate kinase muscle (PKM).

50 In most tissues alternative splicing of the PKM gene yields two isoforms, PKM1 and  
51 PKM2. PKM1 forms a homo tetramer that efficiently converts phosphoenolpyruvate  
52 and ADP into pyruvate and ATP. While PKM2 can similarly form a catalytically efficient  
53 tetramer, it is also found as a monomer/dimer (called monomeric PKM2 hereafter) that  
54 has substantially less catalytic activity<sup>8</sup>. Therefore, in situations where PKM2 is  
55 predominantly monomeric, the rate of glycolytic flux may be slowed leading to an  
56 accumulation of upstream glycolytic intermediates that can be diverted into other  
57 pathways such as the PPP to support cellular biosynthesis. Accordingly, PKM2  
58 expression has been found to be elevated in many cells with high biosynthetic burdens  
59 including tumour cells<sup>9, 10</sup>. Monomeric PKM2 has also been shown to have functions  
60 independent of its metabolic role in glycolysis, primarily in the nucleus where it  
61 contributes to transcriptional control through interactions with the hypoxia inducible  
62 factor-1 $\alpha$  (HIF-1 $\alpha$ ) and signal transduction and activator of transcription (STAT)  
63 transcription factors<sup>10, 11, 12</sup>. The balance between catalytically less active  
64 mono/dimeric PKM2, with potential signalling roles, and catalytically more active  
65 tetrameric PKM2, without signalling roles, is controlled by a range of cellular factors.  
66 For instance, mono/dimeric PKM2 is converted to the catalytically efficient tetramer  
67 when levels of upstream metabolites such as fructose-1,6-phosphate or serine are  
68 high<sup>13, 14, 15</sup>. In this way PKM2 operates as a rheostat by sensing upstream pools of  
69 glycolytic and biosynthetic intermediates and tuning glycolytic rates accordingly to  
70 carefully balance metabolic needs for cellular growth and function.  
71 While activated NK cells are known to engage elevated levels of glycolysis to support  
72 rapid growth, proliferation and function, how glycolytic flux is controlled to promote  
73 these processes in NK cells is not understood. In particular, what role PKM2 plays in  
74 supporting NK cell metabolic and functional responses is unknown. Here we use

75 genetic and pharmacological approaches *in vitro* to show that PKM2 does not have a  
76 significant role in regulating the transcriptional landscape of NK cells. Additionally, we  
77 find that although PKM2 is highly expressed in activated NK cells, in the absence of  
78 PKM2 these cells can precisely adjust the expression of PKM1 to control overall PKM  
79 activity demonstrating a remarkable capability of NK cells for precise metabolic  
80 plasticity. In contrast, acute pharmacological activation of PKM2 catalytic activity  
81 blunted NK cell growth and effector functions. These defects were associated with  
82 increased levels of ROS and a transcriptional signature indicating oxidative stress that  
83 we linked to reduced PPP metabolites and decreased NADPH levels. Overall, this  
84 study reveals an important metabolic role for PKM2 in supporting the PPP and redox  
85 balance in activated NK cells and highlights that PKM2 does not have a profound  
86 transcriptional role in all immune cells.

87

## 88 **Materials and Methods:**

### 89 **Mice**

90 C57BL/6J mice were purchased from Harlan (Bicester, U.K.) and maintained in  
91 compliance with Irish Department of Health and Children regulations and with the  
92 approval of the University of Dublin's ethical review board. Mice were also obtained  
93 from NCI Frederick. Animal care at NCI Frederick was provided in accordance with  
94 procedures in: "A Guide for the Care and Use of Laboratory Animals". Ethics approval  
95 for the animal experiments detailed in this manuscript was received from the  
96 Institutional Animal Care and Use Committee (Permit Number: 000386) at the NCI-  
97 Frederick. *Pkm2*<sup>fl/fl</sup> mice were obtained from Matthew Vander Heiden at MIT, MA<sup>16</sup>.  
98 *Ncr1*<sup>Cre</sup> KI mice were obtained from Eric Vivier, INSERM, France<sup>17</sup>. All mice were

99 backcrossed to a C57BL/6 background. *Pkm2<sup>fl/fl</sup>* mice and *Ncr1<sup>Cre</sup>* KI mice were bred  
100 together and controls were maintained in the same room at NCI Frederick.

101

## 102 **Mouse Genotyping**

103 DNA samples were obtained from mice by tail snip. Tails were digested using 50 µl of  
104 tail lysis buffer and 5 µl of 10 mg/ml proteinase K in 1.5 ml tubes. Tubes were placed  
105 in a heating block at 55°C for 4 hours to overnight, allowing the tails to become  
106 digested. Tails were then heated to 95°C for 10 minutes to inactivate proteinase K.  
107 950 µL of DNase free water was then added to sample. DNA samples were stored at  
108 -20°C until use. *Pkm2<sup>fl/fl</sup>* genotyping was carried out using the following primers:  
109 Forward: 5'-TAG GGC AGG ACC AAA GGA TTC CCT-3', Reverse: 5'-CTG GCC CAG  
110 AGC CAC TCA CTC TTG-3'. PCR reactions were carried out using GoTaq green PCR  
111 reaction buffer (Promega). DNA was cycled according to the following protocol: 94°C  
112 for 3 min, 94°C for 30 sec (x30), 59°C for 30 sec (x30), 72°C for 30 sec (x30). DNA  
113 was then electrophoresed on an agarose gel stained with ethidium bromide. For *Ncr1*  
114 *Cre* genotyping, briefly, the following primers were utilised: Forward - 5' GGA ACT  
115 GAA GGC AAC TCC TG- 3', Reverse (WT)– 5'- TTC CCG GCA ACA TAA AAT AAA-  
116 3', Reverse (Cre) - 5' -CCC TAG GAA TGC TCG TCA AG-3'. PCR reactions were  
117 carried out using GoTaq green PCR reaction buffer (Promega). DNA was cycled  
118 according to the following protocol: 94°C for 3 min, 94°C for 30 sec (x32), 57°C for 30  
119 sec (x32), 72°C for 1 min (x32), 72°C for 3 min. DNA was then electrophoresed on an  
120 agarose gel stained with ethidium bromide.

121

## 122 **Cell Culture:**

123 Splenocytes were isolated and cultured in IL-15 (15 ng/ml; PeproTech) at 37°C for 6  
124 d. On day 4, the cells were supplemented with IL-15 (15 ng/ml) and cultured for an  
125 additional 2 d. On day 6, cultured NK cells were magnetically purified (NK cell Isolation  
126 Kit II, Miltenyi) and stimulated for 18 h with IL-2 (20 ng/ml; National Cancer Institute  
127 Preclinical Repository) and/or IL-12 (10 ng/ml; Miltenyi Biotec) cytokines. Low-dose  
128 IL-15 (6.66 ng/ml) was added as a survival factor to unstimulated cultures.  
129 Experiments were carried out in the presence or absence of TEPP-46 (Cayman  
130 Chemical or EMD Millipore), rapamycin (20 nM; Fisher) or dehydroepiandrosterone  
131 (DHEA) (75 µM, Sigma Aldrich). Splenocytes were cultured in RPMI medium  
132 containing 10% FBS, 2 mM glutamine (Thermo Fisher), 50 µM 2-ME (Sigma-Aldrich),  
133 and 1% Penicillin/Streptomycin (Thermo Fisher).

#### 134 **NK cell activation with polyinosinic-polycytidylic acid *in vivo***

135 Mice were injected i.p. with 200 µg polyinosinic-polycytidylic acid [poly(I:C)] in saline  
136 (InvivoGen). Mice were sacrificed after 24 hrs. Spleens were harvested, and NK cells  
137 were analysed.

138

#### 139 **Murine cytomegalovirus infection model**

140 Stock of MCMV was a gift from the Michael Brown lab at the University of Virginia.  
141 MCMV stock was obtained from salivary gland passage of MCMV infected BALB/c  
142 mice.  $1 \times 10^5$  PFU of virus in 100 µL was injected into the left side of the peritoneum  
143 in saline. Vehicle controls were given 100 µL of saline only. On day 4 post-infection,  
144 4 hours prior to harvest, mice were injected with BrDU in saline i.p. Mice were then  
145 euthanised after 4 hours and tissues harvested. DNA from spleen was digested  
146 overnight with DNeasy extraction kit (Qiagen) for further downstream qPCR analysis.

147 Primers were from Integrated DNA Technologies. Primers used were as follows:  
148 Forward:5'-TGTGTGGATACGCTCTCACCTCTAT-3', Rev:5'GTTACACCAAGCCT  
149 TTCCTGGAT-3' (Integrated DNA Technologies). Taqman Probe was obtained from  
150 TaqMan Thermo Fisher 5'-TTCATCTGCTGCCATACTGCCAGCTG-3'. Data were  
151 normalised to the probe for housekeeping gene  $\beta$ -Actin (Thermo Fisher). Primer  
152 sequences were obtained from a previously published paper by Kazuo et. al<sup>18</sup> qPCR  
153 data was obtained using the following reaction master mix: 900 nM forward primer,  
154 900 nM reverse primer, 200 nM Taqman probe, 1 X EagleTaq master mix (Roche)  
155 and 50ng/  $\mu$ L of DNA in 20  $\mu$ L reaction volume. Master mix then underwent thermal  
156 cycling according to the following protocol: 50°C for 2 minutes, 95°C for 10 minutes,  
157 denaturation at 95°C for 15 s, and extension at 60°C for 1 minute. MCMV qPCR data  
158 is represented as relative levels between groups, normalised to  $\beta$ -actin. Mice used  
159 were 7-10 weeks old.

160

### 161 **Flow cytometry**

162 Cells were incubated for 10 min at 4 °C with Fc blocking antibody CD16/CD32 (2.4G2)  
163 and subsequently stained for 20 min at 4 °C with saturating concentrations of  
164 fluorophore conjugated antibodies. Antibodies used were as follows: NK1.1–eFluor  
165 450 (PK136), NK1.1–BV421 (PK136), NK1.1-APC (PK136), NKp46–PerCP eFluor  
166 710 (29A1.4), NKp46–PE (29A1.4), NKp46–efluor450 (29A1.4), CD3–FITC (145-  
167 2C11), CD3–PacBlue (500A2), TCR $\beta$ –APC (H57-597), TCR $\beta$ –PE (H57-597), CD69–  
168 PerCp-Cy5.5 (H1.2F3), IFN $\gamma$ –APC (XMG1.2), IFN $\gamma$ –eFluor450 (XMG1.2), granzyme  
169 B–PE-Cy7 (NGZB), BrDU – APC (B44), TCRb–PECy7 (H57-597), CD69–PE  
170 (H1.2F3), NK1.1–APC (PK136), Ly49H – PE (3D10), CD11b-PE-Cy7 (M1/70), CD27-  
171 FITC (LG.7F9), PKM2- PE purchased from Abcam, eBiosciences, Biolegend, Thermo

172 Fisher and BD Biosciences. L/D Aqua (Thermo Fisher) was used as a viability dye.  
173 Live cells were gated according to their forward scatter (FSC-A) and side scatter or  
174 according to L/D Aqua negative cells, single cells according to their FSC-W and FSC-  
175 A, NK cells were identified as NK1.1<sup>+</sup>, NKp46<sup>+</sup> and CD3<sup>-</sup> cells. Cellular ROS  
176 measurements were obtained using H2-DCFDA flow cytometric dye (5 μM) (Thermo  
177 Fisher). For intracellular staining the cells were incubated for 4 h with the protein  
178 transport inhibitor GolgiPlug (BD Biosciences). For fixation and permeabilization of the  
179 cells, the Cytofix/Cytoperm kit from BD Biosciences was used according to  
180 manufacturer's instructions. BrDU staining was carried out according to  
181 manufacturer's instructions (BD Biosciences). Data were acquired on either a  
182 FACSCanto, a LSR Fortessa, or LSR II (Beckton Dickson). Flow cytometry data was  
183 analysed using FlowJo 10.

184

### 185 **Cytometric bead array**

186 For cell supernatant measurements, cells were seeded at  $2 \times 10^6$  per mL and treated  
187 with cytokines. After 18 hours, supernatants were harvested and frozen for later  
188 analysis. For serum measurements, blood was harvested from mice by cardiac  
189 puncture. Serum was harvested by centrifugation in serum separator tubes at top  
190 speed for two minutes. CBA was performed as per manufacturers (Becton Dickinson)  
191 instructions using 50 μL of supernatant or serum per sample and analysed by flow  
192 cytometry on a BD Fortessa. Data was analysed using FCAP Array software (BD  
193 Biosciences).

194

### 195 **Real-time quantitative PCR**



196 Cultured NK cells were purified using MACS purification with the NK isolation kit II  
197 (Miltenyi Biotech) prior to stimulation. RNA was isolated using the RNeasy RNA  
198 purification mini kit (QIAGEN) or GeneJET RNA purification kit (Thermo Fisher(  
199 according to the manufacturer's protocol. From purified RNA, complementary DNA  
200 (cDNA) was synthesised using the reverse-transcriptase kit qScript cDNA synthesis  
201 kit (Quanta Biosciences) or high capacity reverse DNA synthesis kit (Applied  
202 biosciences). Real-time PCR was performed in triplicate in a 96-well plate using iQ  
203 SYBR Green-based detection on an ABI 7900HT fast qPCR machine. For the  
204 analysis of mRNA levels using SYBR green detection the derived values were  
205 normalised to Rplp0 mRNA levels. Primers: *Rplp0* forward: 5'-  
206 CATGTCGCTCCGAGGGAAG-3', *Rplp0* reverse: 5'-CAGCAGCTGGCACCTTATTG-  
207 3', *Pkm2* forward: 5'- GCTATTTCGAGGAACTCCGCC-3', *Pkm2* reverse:5'-  
208 AAGGTACAGGCACTACA  
209 CGC-3'. For the analysis of mRNA levels using Taqman detection the derived values  
210 were normalised to HPRT mRNA levels. *Pkm2*:Probe: 5'-/56FAM/TTATCGTTC/ZEN/  
211 TCACCAAGTCTGGCA/3IABkFQ/-3',Primer 1: 5'TTCGAGTCACGGCAATGATAG-3',  
212 Primer 2: 5'-TCCTTCAAGTGCTGCAGTG-3', *Hprt*: Proprietary Probe  
213 Mm01545399\_m1 Cat: 4331182

214

## 215 **Proteomics**

216 For proteomic analysis,  $5 \times 10^6$  purified cultured NK cells were stimulated for 18 h in  
217 RPMI media containing IL-2 (20 ng/ml) plus IL-12 (10 ng/ml). To remove dead cells, a  
218 density gradient (Lymphoprep, Axis-Shield) was used. Cells were spun down and  
219 stored at  $-80^\circ\text{C}$  until further preparation. Cell pellets were lysed in 400  $\mu\text{l}$  lysis buffer  
220 (4% SDS, 50 mM TEAB pH 8.5, 10 mM TCEP). Lysates were boiled and sonicated

221 with a BioRuptor (30 cycles: 30 s on, 30 s off) before alkylation with iodoacetamide for  
222 1 h at room temperature in the dark. The lysates were subjected to the SP3 procedure  
223 for protein clean-up before elution into digest buffer (0.1% SDS, 50 mM TEAB pH 8.5,  
224 1 mM CaCl<sub>2</sub>) and digested with LysC and Trypsin, each in a 1:50 (enzyme:protein)  
225 ratio. Tandem mass tag (TMT) labelling and peptide clean-up were performed  
226 according to the SP3 protocol. Samples were eluted into 2% dimethyl sulphoxide in  
227 water, combined and dried in vacuo. The TMT samples were fractionated using off-  
228 line high pH reverse phase chromatography: samples were loaded onto a  
229 4.6 × 250 mm Xbridge™ BEH130 C18 column with 3.5 μm particles (Waters). Using a  
230 Dionex BioRS system, the samples were separated using a 25 min multistep gradient  
231 of solvents A (10 mM formate at pH 9 in 2% acetonitrile) and B (10 mM ammonium  
232 formate pH 9 in 80% acetonitrile) at a flow rate of 1 ml/min. Peptides were separated  
233 into 48 fractions which were consolidated into 24 fractions. The fractions were  
234 subsequently dried and the peptides redissolved in 5% formic acid and analysed by  
235 liquid chromatography–mass spectrometry (LC-MS).

236

### 237 **Western blotting**

238 For western blot analysis, cells were harvested, washed twice with ice-cold PBS and  
239 lysed at  $1 \times 10^7$ /ml in lysis buffer containing 50 mM Tris Cl pH 6.7, 2% SDS, 10%  
240 glycerol, 0.05% Bromophenol Blue, 1 μM dithiothreitol (DTT), phosphatase and  
241 protease inhibitors. Samples were denatured at 95 °C for 10 min, separated by sodium  
242 dodecyl sulphate–polyacrylamide gel electrophoresis and transferred to a  
243 polyvinylidene difluoride membrane. PKM1 (D30G6), PKM2 (D78A4) and phospho-  
244 S6 ribosomal protein (Ser235/236) (D57.2.2E) were obtained from Cell Signalling.  
245 Actin (AC-15) was obtained from Abcam. Total S6 ribosomal protein (C-8) was

246 obtained SantaCruz Biotechnology. Where western blotting stripping was required,  
247 Restore™ western blot stripping buffer (Thermo Fisher) was used, blots were re-  
248 blocked and subsequently probed for different protein.

249

### 250 **Seahorse metabolic flux analysis**

251 For real-time analysis of the extracellular acidification rate (ECAR) and oxygen  
252 consumption rate (OCR) of purified and expanded NK cells cultured under various  
253 conditions, a Seahorse XF-24 Analyser or a Seahorse XFe-96e Analyser (Agilent  
254 technologies) was used. In brief, 750,000 MACS purified, expanded NK cells were  
255 added to a 24-well XF Cell Culture Microplate, 200,000 MACS purified NK cells to a  
256 96-well XFe Cell Culture Microplate. All cell culture plates were treated with Cell-Tak™  
257 (BD Pharmingen) to ensure that the NK cells adhere to the plate. Sequential  
258 measurements of ECAR and OCR following addition of the inhibitors (Sigma)  
259 oligomycin (2 µM), FCCP (1 µM), rotenone (100 nM) plus antimycin A (4 µM), and 2-  
260 deoxyglucose (2DG, 30 mM) allowed for the calculation of basal glycolysis, glycolytic  
261 capacity, basal mitochondrial respiration, and maximal mitochondrial respiration.

262

### 263 **Pyruvate kinase activity assay**

264 For analysis of pyruvate kinase activity, cultured NK cells were purified and stimulated  
265 and lysed using assay buffer from the manufacturer (Biovision). Cells were lysed as  
266 75,000 cells per well and carried out in triplicate technical replicates. The assay was  
267 fluorometrically measured over time on a SpectaMax plate reader.

268

### 269 **NADPH level assay**

270 Cells were lysed in 0.1 M NaOH with 0.5% DTAC for NADPH determination at 0.1 x  
271 10<sup>6</sup> cells per well. Relative NADPH levels were then determined using the NADPH-  
272 Glo assay kit (Promega) as per manufacturer's instructions.

273

#### 274 **RNA sequencing**

275 2 x 10<sup>6</sup> MACS purified NK cells were washed twice in cold PBS. Cells were then lysed  
276 using the Gene Jet lysis buffer (Thermo Fisher). mRNA was purified using the Gene  
277 Jet RNA kit according to manufacturer's instructions. RNA was quantified using  
278 NanoDrop. RNA was then snap frozen in liquid nitrogen and sent on dry ice to the  
279 Frederick National Laboratory Sequencing facility for sequencing. RNA samples were  
280 first subjected to quality control analysis. RNA-Seq samples were then pooled and  
281 sequenced on HiSeq4000 using Illumina TruSeq Stranded Total RNA Library Prep  
282 and paired-end sequencing. The samples had 52 to 246 million pass filter reads with  
283 more than 90% of bases above the quality score of Q30. Reads of the samples were  
284 trimmed for adapters and low-quality bases using Cutadapt before alignment with the  
285 reference genome (Mouse - mm10) and the annotated transcripts using STAR. Library  
286 complexity was measured in terms of unique fragments in the mapped reads using  
287 Picard's Mark Duplicate utility. The gene expression quantification analysis was  
288 performed for all samples using STAR/RSEM tools.

289 For mRNA quantification, BAM files were imported into Partek Genomic Suite software  
290 (Partek Inc.) and the built-in RNA-seq workflow pipeline was used. Reads were aligned  
291 and quantified using RefSeq transcripts database based on the E/M algorithm.

292 Gene-level RPKMs were used for subsequent analyses. Differentially expressed  
293 genes were identified by analysis of variance (ANOVA). The threshold value has been

294 set at 1.5-fold change and a false discovery rate (FDR) < 0.5. Differentially expressed  
295 genes were analysed by ingenuity pathway analysis (IPA; Ingenuity Systems).

296

## 297 **Metabolomics**

298

### 299 **GC-MS Mass spectrometry Metabolomics**

300

301 Untargeted mass spectrometry was carried out by West Coast Metabolomics at UC

302 Davis.  $10 \times 10^6$  MACS purified NK cells were washed 3 times in cold PBS. Samples

303 were then snap frozen in liquid nitrogen. At UC Davis, samples were re-suspended

304 with 1 ml of extraction buffer (37.5% degassed acetonitrile, 37.5% isopropanol and

305 20% water) at  $-20^\circ\text{C}$ , centrifuged and evaporated to complete dryness. Membrane

306 lipids and triglycerides were removed with 50% acetonitrile in water. The extract was

307 aliquoted into two equal portions and the supernatant evaporated again. Internal

308 standards C08-C30 fatty acid methyl esters were added and the sample derivatized

309 by methoxyamine hydrochloride in pyridine and subsequently by *N*-methyl-*N*-

310 trimethylsilyltrifluoroacetamide for trimethylsilylation of acidic protons. Gas

311 chromatography-time-of-flight analysis was performed by the LECO Pegasus IV mass

312 spectrometer. Samples were additionally normalised using the sum of peak heights

313 for all identified metabolites (mTIC Normalisation).

314

315

### 316 **LC-MS Mass spectrometry Metabolomics**

317 Cell pellets were washed and resuspended in ice cold 80% methanol. Phase

318 separation was achieved by centrifugation at  $4^\circ\text{C}$  and the methanol-water phase

319 containing polar metabolites was separated and dried using a vacuum concentrator.

320 The dried metabolite samples were stored at  $-80^\circ\text{C}$  and resuspended in Milli-Q water

321 the day of analysis. An Agilent 6410 Triple Quadrupole mass spectrometer interfaced

322 with a 1200 Series HPLC quaternary pump (Agilent) was used for ESI-LC–MS/MS  
323 analysis in multiple reaction monitoring mode. Seven concentrations of standards,  
324 processed under the same conditions as the samples, were used to establish  
325 calibration curves. The best fit was determined using regression analysis of the peak  
326 analyte area. Chromatographic resolution was obtained in reverse phase on a Zorbax  
327 SB-C18 (1.8 µm; Agilent) for amino acids and an Eclipse Plus C18 (1.8 µm; Agilent)  
328 for TCA and PPP intermediates, with a flow rate set at 0.4 ml/min. Data were  
329 normalised to protein concentration.

### 330 **Statistical analysis**

331 Statistical analysis was performed by GraphPad Prism 8, with the tests used indicated  
332 in the figure legend. Datasets where two independent parameters were being  
333 compared (genotype and stimulation/treatment) were analysed by two-way ANOVA  
334 with Sidaks post-test. Datasets one variable parameter (treatment) with more than two  
335 groups were analysed by one-way ANOVA with Tukey's post-test. Datasets with one  
336 variable (treatment) and two groups were analysed by a Students t test. Data were log  
337 transformed where appropriate before analysis. Flow cytometry data was analysed  
338 using FlowJo 10. \* $p < 0.05$ , \*\* $p < 0.01$ , \*\*\* $p < 0.001$ . All error bars represent the  
339 mean  $\pm$  the standard error of the mean (S.E.M).

340

### 341 **Results:**

#### 342 **PKM2 expression is induced in activated NK cells.**

343 To investigate whether NK cell activation *in vivo* is associated with changes in PKM2  
344 expression mice were injected with poly(I:C) and splenocytes were isolated for  
345 analysis. There was a significant increase in the expression of PKM2 NK cells from  
346 mice that received poly(I:C) as measured by flow cytometry (Figure 1a). To further

347 investigate PKM2 expression splenic NK cells were cultured for 6 days in low dose IL-  
348 15, a cytokine required for DC-mediated NK cell priming *in vivo*<sup>19, 20, 21</sup> (called ‘cultured  
349 NK cells’ hereafter). These cultured NK cells were purified and stimulated with IL-2  
350 plus IL-12 and PKM2 protein and mRNA expression measured over the course of 24  
351 hours by western blot analysis and rtPCR, respectively. The expression of PKM2  
352 increased over time following activation peaking at 24 hours post cytokine stimulation  
353 (Figure 1b). The mammalian Target of Rapamycin complex 1 (mTORC1) has been  
354 shown to be active in both NK cells stimulated *in vivo* following poly(I:C) injection and  
355 in IL-2/IL-12 stimulated NK cells and is an important regulator of NK cell metabolism<sup>2</sup>.  
356 Inhibition of mTORC1 activity using the inhibitor rapamycin significantly reduced the  
357 abundance of PKM2 mRNA and protein in IL-2/12 stimulated cultured NK cells (Figure  
358 1c). Rapamycin efficacy was confirmed by immunoblot for phosphorylation of the  
359 mTORC1 target, ribosomal s6 protein (Figure 1c). Quantitative proteomics analysis  
360 revealed that PKM2 is 9 fold more abundant than PKM1 in cytokine activated NK cells  
361 (Figure 1d). Therefore, PKM2 expression is robustly increased in activated NK cells  
362 and is the dominant pyruvate kinase isoform in these metabolically active cells.

363

#### 364 **PKM2<sup>NK-KO</sup> mice show no defects in splenic NK cell development and function.**

365 To investigate the importance of PKM2 during NK cell responses, NK cell-specific  
366 *Pkm2* knockout mice were generated by backcrossing mice with loxP sites flanking  
367 the exon specific for *Pkm2*, exon 10, with mice expressing Cre recombinase under the  
368 control of the *Ncr1* promoter<sup>16, 22</sup>. NK cells were purified by cell sorting from the  
369 spleens of *Pkm2*<sup>fllox/fllox</sup> *Ncr1*-Cre mice (hereafter called *Pkm2*<sup>NK-KO</sup>) and control mice  
370 (*Pkm2*<sup>WT/WT</sup> *Ncr1*-Cre, hereafter called *Pkm2*<sup>NK-WT</sup>) and DNA was isolated. The  
371 *Pkm2*<sup>WT/WT</sup> or *Pkm2*<sup>fl/fl</sup> genes were amplified using PCR and electrophoresed on a

372 DNA agarose gel (Figure 2a). The data show that NK cells containing both the *Ncr1*-  
373 Cre transgene and homozygous for the *Pkm2<sup>fl</sup>* locus specifically excise the exon 10 of  
374 *Pkm2* gene leading to a smaller DNA band (~200kb) (Figure 2a). Remaining  
375 splenocytes (not including NK cells) show a normal sized band for *Pkm2<sup>fl/fl</sup>* (~600kb).  
376 NK cells developed normally in *Pkm2<sup>NK-KO</sup>* mice as the numbers and frequencies of  
377 NK cells and NK cells subsets were normal in the spleen when compared to control  
378 *Pkm2<sup>NK-WT</sup>* mice (Figure 2b,c). Consistent with normal NK cell development splenic  
379 *Pkm2<sup>NK-KO</sup>* NK cells expanded normally *ex vivo* in response to low dose IL-15,  
380 important for NK cells homeostatic proliferation (Figure 2d). Cultured *PKM2<sup>NK-KO</sup>* and  
381 *PKM2<sup>NK-WT</sup>* NK cells were stimulated with IL-2/IL-12 cytokine for 18 hours and  
382 analysed by flow cytometry for the expression of effector molecules. *Pkm2<sup>NK-KO</sup>* NK  
383 cells expressed comparable levels of the cytotoxic granule component granzyme B  
384 and produced equivalent amounts of IFN $\gamma$  compared to *Pkm2<sup>NK-WT</sup>* NK cells (Figure  
385 2e-h). Additionally, there were no differences in the secretion of cytokines (IFN $\gamma$ , TNF $\alpha$   
386 and IL-10) or chemokines (MIP1 $\alpha$  and MIP1 $\beta$ ) between stimulated *Pkm2<sup>NK-KO</sup>* and  
387 *Pkm2<sup>NK-WT</sup>* NK cells (Figure 2i, j).

388

### 389 ***PKM2<sup>NK-KO</sup>* mice respond normally to MCMV infection.**

390 As cellular metabolism is considered to be of particular importance in highly  
391 proliferative cells, we next investigated whether *Pkm2<sup>NK-KO</sup>* mice could clear MCMV  
392 infection normally. NK cells are particularly important in the early immune response to  
393 this viral infection and a subset of Ly49H<sup>+</sup> NK cells undergo robust proliferation in  
394 MCMV infected mice. Therefore, *Pkm2<sup>NK-KO</sup>* and *Pkm2<sup>NK-WT</sup>* mice were infected with  
395 MCMV (1x10<sup>5</sup> PFU from salivary passage) i.p. and analyzed 4 days post infection.  
396 The spleen size as determined by weight was equivalent in *Pkm2<sup>NK-KO</sup>* and *Pkm2<sup>NK-WT</sup>*



397 mice as were the numbers of NK cells and the frequencies of Ly49H<sup>+</sup> splenic NK cells  
398 (Figure 3a-c). In addition, there was no difference in NK cell activation in *Pkm2*<sup>NK-KO</sup>  
399 and *Pkm2*<sup>NK-WT</sup> mice based on CD69 expression. Additionally, Ly49H<sup>+</sup> cells from these  
400 mice showed equivalent levels of virus-induced proliferation based on BrDU  
401 incorporation (Figure 3d-g). There were no differences in the levels of IFN $\gamma$ , TNF $\alpha$  and  
402 IL10 in the serum of uninfected or MCMV infected *Pkm2*<sup>NK-KO</sup> and *Pkm2*<sup>NK-WT</sup> mice  
403 (Figure 3h). Finally, viral loads on day 4 were similar in *Pkm2*<sup>NK-KO</sup> and *Pkm2*<sup>NK-WT</sup> mice  
404 (Figure 3i). These data clearly show that the immune response to MCMV infection was  
405 not compromised in mice containing *Pkm2* deficient NK cells 4 days post infection.

406

407 **PKM2<sup>NK-KO</sup> NK cells adjust PKM1 expression to normalise total pyruvate kinase**  
408 **activity.**

409 Considering the important roles described for PKM2 in other immune cells, the lack of  
410 any functional phenotype in *Pkm2*<sup>NK-KO</sup> was intriguing. Next we considered whether  
411 the loss of *Pkm2* affected the metabolic pathways used by *Pkm2*<sup>NK-KO</sup> NK cells. Firstly,  
412 the flux through glycolysis and OXPHOS was assessed using the Seahorse  
413 extracellular flux analyzer. The basal and maximal rates of glycolysis and of OXPHOS  
414 were comparable in both unstimulated and IL2/IL12 stimulated *Pkm2*<sup>NK-KO</sup> compared  
415 to *Pkm2*<sup>NK-WT</sup> NK cells (Figure 4a-e). In addition the levels of glycolytic intermediates,  
416 pentose phosphate pathway components (PPP) and elements of the tricarboxylic  
417 acid (TCA) cycle were similar in *Pkm2*<sup>NK-KO</sup> and *Pkm2*<sup>NK-WT</sup> NK cells (Figure 4f-h).  
418 Therefore, despite lacking the most highly expressed pyruvate kinase subunit (Figure  
419 1e), which is known to play a crucial role in controlling the metabolism of other immune  
420 cell subsets, there were no substantial differences in the metabolic status of *Pkm2*-  
421 null NK cells. One possible explanation for the surprising lack of a metabolic

422 phenotype in *Pkm2*-null NK cells could be due to compensatory changes in the  
423 expression of another pyruvate kinase isoform. Indeed, RNA and protein analyses  
424 using rtPCR, RNAseq and western blotting revealed that expression of PKM1, the  
425 alternative splice variant of *Pkm2*, was significantly increased in *Pkm2*<sup>NK-KO</sup> compared  
426 to *Pkm2*<sup>NK-WT</sup> NK cells (Figure 4i-k). Remarkably, *Pkm2*<sup>NK-KO</sup> NK cells had precisely  
427 compensated with increased PKM1 expression to maintain an extraordinarily similar  
428 rate of overall pyruvate kinase activity, as measured using a direct biochemical  
429 enzymatic assay (Figure 4l). This re-calibration of pyruvate kinase activity  
430 demonstrates the metabolic plasticity of NK cells.

431

#### 432 **PKM2 does not substantially regulate gene expression in activated NK cells.**

433 While PKM1 expression can compensate for the lack of PKM2 in terms of catalyzing  
434 the final step of glycolysis, PKM1 has not been demonstrated to have the non-  
435 glycolytic roles that have been ascribed to mono/dimeric PKM2, such as the regulation  
436 of transcription factors such as HIF1 $\alpha$  and STAT5. Therefore, we used RNAseq  
437 analysis to investigate whether there were any differences in gene expression in  
438 *Pkm2*<sup>NK-KO</sup> versus *Pkm2*<sup>NK-WT</sup> NK cells. There were very few significant differentially  
439 expressed genes (DEG) in the transcriptome of *Pkm2*<sup>NK-KO</sup> versus *Pkm2*<sup>NK-WT</sup> NK cells  
440 (Figure 5a). There were only 2 genes upregulated by over 2-fold and 4 genes  
441 downregulated by greater than 2-fold expression with a false discovery rate of 0.05  
442 (Figure 5a, Supplementary Table 1). PKM2 has been linked to the control of gene  
443 expression through its regulation of HIF1 $\alpha$  and STAT5 transcription factors<sup>23</sup>.  
444 Importantly, there was no enrichment for HIF1 $\alpha$  or STAT5 target genes in the  
445 differentially expressed mRNA in *Pkm2*<sup>NK-KO</sup> NK cells (Figure 5b and c, Supplementary  
446 table 2). To further investigate the effect of PKM2 in NK cell gene expression, an acute

447 pharmacological approach was used to manipulate PKM2 function. TEPP-46 is a  
448 pharmacological activator of PKM2 function that promotes the oligomerisation of  
449 mono/dimeric PKM2 into tetrameric, catalytically active PKM2<sup>15</sup>, resulting in the loss  
450 of non-glycolytic PKM2 signalling functions<sup>23</sup>. Therefore, cultured NK cells were  
451 stimulated with IL-2/IL-12 in the presence or absence of TEPP-46 and analysed by  
452 RNA-seq. The transcriptomes were remarkably similar between the two conditions  
453 with only 10 DEG with a fold change cutoff of 2 and a FDR of 0.05 (Figure 5d).  
454 Amongst these genes there was again no enrichment for HIF1 $\alpha$  or STAT5 targets  
455 aside from a small but significant increase in *Bcl2* expression (Figure 5e,f). Therefore,  
456 using both genetic and pharmacological approaches these data clearly show that  
457 PKM2 is not necessary for the regulation of the NK cell transcriptome.

458

#### 459 **Monomeric PKM2 is important for cytokine-induced NK cells responses.**

460 PKM2 tetramerisation in response to TEPP-46 results in increased PKM2 enzymatic  
461 activity leading to an increased rate of phosphoenolpyruvate conversion to pyruvate  
462 at the end of glycolysis. As expected, addition of TEPP-46 for one hour to cultured NK  
463 cells that had been previously stimulated for 18 hours with IL-2/IL-12, resulted in an  
464 increase in pyruvate kinase activity and of cellular glycolysis (Figure 6a-c). These data  
465 confirm that a substantial portion of PKM2 is present in the less catalytically active  
466 mono/dimeric conformation in IL-2/IL-12 stimulated NK cells, as its enzymatic activity  
467 can be boosted by TEPP-46. To investigate the importance of mono/dimeric PKM2  
468 during NK cell activation, cultured NK cells were stimulated with IL-2/IL-12 for 18 hours  
469 in the presence or absence of TEPP-46. NK cells treated with TEPP-46 were viable  
470 but showed reduced production of IFN $\gamma$  and reduced granzyme B expression (Figure

471 6d-f). TEPP-46 treated NK cells also secreted reduced amounts of TNF $\alpha$  and IL10  
472 while maintaining normal production of MIP1 $\alpha/\beta$  chemokines (Figure 6g-h).

473

474 Flow cytometric analysis revealed that NK cells stimulated in the presence of TEPP-  
475 46 were smaller in size than vehicle treated NK cells suggesting defects in cellular  
476 growth (Figure 7a). This was consistent with the concept that monomeric PKM2  
477 promotes cellular growth by limiting the last step of glycolysis and allowing glycolytic  
478 intermediates to be diverted into biosynthetic pathways. In this scenario TEPP-46  
479 would drain glycolysis of glycolytic intermediates and reduce biosynthesis and cellular  
480 growth. However, NK cells stimulated with IL-2/IL-12 plus TEPP-46, the basal rates of  
481 glycolysis were equivalent to those of NK cells stimulated with IL-2/IL-12 alone (Figure  
482 7b). Although there was a small but significant effect on NK cell glycolytic capacity  
483 (Figure 7c). While metabolomics analysis showed no decrease in the levels glycolytic  
484 intermediates there were decreased levels of the PPP metabolite ribose-5-phosphate  
485 (R5P) arguing that in the presence of TEPP-46 glucose-6-phosphate might be  
486 withheld from the PPP (Figure 7d,e). Since, the PPP is important for the biosynthesis  
487 of nucleotides and for maintaining redox balance in the cell, we considered whether  
488 decreased flux through the PPP in response to TEPP-46 might lead to increased  
489 cellular ROS levels. Indeed, TEPP-46 treated NK cells showed a dramatic increase in  
490 ROS compared to vehicle controls, as measured using the flow cytometric ROS probe  
491 H2-DCFDA (Figure 8a). Inhibition of flux through the PPP using the glucose-6-  
492 phosphate dehydrogenase inhibitor, DHEA, similarly resulted in an increase in ROS  
493 (Figure 8b). The PPP supports redox balance because it generates NADPH, the  
494 electron donor required for the redox enzymes glutathione reductase and thioredoxin  
495 reductase. Accordingly, we found a significant decrease in the levels of NADPH in

496 TEPP-46 treated NK cells (Figure 8c). Moreover, supporting that there was increased  
497 oxidative stress in TEPP-46 treated NK cells, our RNAseq data showed that two of the  
498 most significantly upregulated genes TEPP-46 treated NK cells were members of the  
499 metallothionein family, namely *Mt1* and *Mt2* (Figure 8d). Metallothioneins are a set of  
500 zinc responsive proteins that have antioxidant properties and are known to be induced  
501 in response to oxidative stress<sup>24</sup>.

502 As oxidative stress can be linked to mitochondrial damage, we next investigated  
503 mitochondrial function in NK cells stimulated with or without TEPP-46. While there  
504 was no difference in the mitochondrial mass in TEPP-46 treated NK cells (Figure 8e)  
505 we found that there was a substantial decrease in the basal rates of OXPHOS (Figure  
506 8f). Additionally, there was a greatly decreased maximum respiration and spare  
507 respiratory capacity (Figure 8g,h). Normal mitochondrial mass with reduced maximum  
508 respiration suggest that there was reduced fueling of OXPHOS. Two prominent  
509 metabolic cycles that feed electrons into the mitochondrial electron transport chain are  
510 the TCA cycle and the Citrate-Malate shuttle<sup>1,4</sup>. The metabolites of both these cycles  
511 were reduced in TEPP-46 treated NK cells (Figure 8i). While malate is shared between  
512 both these metabolic cycles, succinic and fumaric acids are specific for the TCA cycle.  
513 In line with decreased fueling of oxidative metabolism, the levels of glutamine and  
514 glutamate were also reduced indicative of impaired glutaminolysis (Figure 8j).  
515 Taken together, this study demonstrates that PKM2 is involved in metabolic but not  
516 transcriptional regulation of NK cell responses.

517

## 518 **Discussion**

519 PKM2 is a metabolic enzyme that has received significant attention in the  
520 immunometabolism field because in addition to its role in glycolysis it can have non-

521 metabolic functions, augmenting transcriptional programmes to regulate immune  
522 function. This “moonlighting” activity has been demonstrated in macrophages, T cells  
523 and cancer cells where PKM2 supports the function of transcription factors including  
524 HIF1 $\alpha$  and STATs<sup>23, 25, 26</sup>. Our study shows that PKM has no significant role in  
525 regulating HIF1 $\alpha$  and STAT associated gene expression in NK cells. The data clearly  
526 show that while PKM2 is most highly expressed isoform in NK cells, either deletion of  
527 PKM2 or allosteric tetramerisation of PKM2 has minimal impact upon the NK cell  
528 transcriptome and there was no evidence of significantly altered expression of HIF1 $\alpha$   
529 or STAT target genes. This study highlights that diversity of regulatory circuits in  
530 immune cells and shows the importance of verifying mechanisms in individual immune  
531 cell subsets.

532 Stimulated NK cells preferentially express PKM2 over PKM1 for metabolic reasons.  
533 Unlike PKM1, PKM2 can exist in different conformations that have different catalytic  
534 activities. PKM2 tetramers are highly enzymatically active and have a Km for  
535 phosphoenolpyruvate of 0.03 mM, whereas PKM2 mono/dimers are considerably less  
536 active with a Km of 0.46 mM as measured in breast cancer cells<sup>27</sup>. Therefore, the  
537 expression of PKM2 gives NK cells the ability to quickly regulate their glycolytic flux  
538 towards anabolic or catabolic processes and confers upon them a level of metabolic  
539 plasticity. It has been previously demonstrated that NK cells lacking the metabolic  
540 regulator mTORC1 are defective in responding to MCMV challenge<sup>28</sup>. Similarly, mice  
541 treated with 2-deoxyglucose, a glycolytic inhibitor are impaired in their responses to  
542 MCMV<sup>29</sup>. However, in this study, genetic deletion of *Pkm2* resulted in a normal  
543 phenotype 4 days post-MCMV infection. *Pkm2*<sup>NK-KO</sup> cells only express PKM1 which in  
544 theory should be kinetically more efficient at producing pyruvate than *Pkm2*<sup>NK-WT</sup> cells.  
545 It would have been expected that these PKM1-only expressing cells would

546 demonstrate dysregulated metabolism and higher levels of glycolytic flux. However,  
547 the PKM1-only expressing NK cells in this study demonstrated a remarkable ability to  
548 transcriptionally titrate the overall level of PKM1 to match a similar level of glycolytic  
549 flux to *Pkm2*<sup>NK-WT</sup> cells *in vitro*. We propose that this compensation is sufficient to  
550 allow NK cells to mount a normal immune response to MCMV infection, a process for  
551 which regulated NK cell metabolism is known to be important.

552 Although, PKM1 can metabolically compensate for PKM2, there is no evidence in the  
553 literature that PKM1 can substitute for PKM2-mediated signalling and transcriptional  
554 regulation. The data presented in this study show that PKM2 deletion does not  
555 adversely affect previously described PKM2-regulated signalling axes. These data are  
556 surprising as PKM2 has been previously shown to regulate cMyc, HIF1 $\alpha$  and STAT5  
557 signalling in CD4 T cells<sup>23</sup>. It is tempting to speculate that these profound differences  
558 may be due to both functional and technical reasons. Although NK cells and T cells  
559 are both lymphoid immune cells, and have similar functional roles, their methods and  
560 contexts of activation vastly differ. T cells require a two-signal activation composed of  
561 both TCR/costimulatory molecule ligation and/or IL-2 signalling. In the context of  
562 PKM2-mediated T cell metabolic signalling, it is possible that receptor-mediated  
563 signalling may play an important role in activating the non-metabolic functions of  
564 PKM2. Indeed, in TCR stimulated T cells, levels of phosphoenolpyruvate (a PKM  
565 substrate) positively regulates activation of nuclear factor of activated T cells (NFAT)<sup>6</sup>.  
566 Therefore, in theory, increased PKM2 activity would drain the pool of  
567 phosphoenolpyruvate, resulting in decreased NFAT activation in response to TCR  
568 ligation. It is interesting to note that NFAT has been previously shown to regulate  
569 transcription at the cMyc promoter<sup>30</sup>. Therefore this may somewhat explain why NK  
570 cells have a less profound signalling phenotype than CD4<sup>+</sup> T cells. In this study, NK

571 cells were activated *in vitro* using cytokines. It is interesting to speculate that receptor  
572 mediated activation of NK cells may similarly reveal a signalling role for PKM2 *in vitro*.  
573 From a technical point of view, it may also be that the method of PKM2 manipulation  
574 plays a role in whether PKM2 is required for transcription in different experimental  
575 systems. Indeed, most studies investigating PKM2 in immune cells using genetic  
576 approaches utilise shRNA to knock it down<sup>31</sup> or acute excision of exon 10 using  
577 tamoxifen Cre models *in vitro*<sup>25</sup>. Knockdown approaches do not always lead to total  
578 deletion of the protein and may have differential effects to a total knock out<sup>32</sup>. Similarly,  
579 studies that utilize a tamoxifen Cre method of PKM2 ablation may also see more acute  
580 effects of PKM2 deletion. For example, Palsson-McDermott et. al, utilized a tamoxifen  
581 Cre x *Pkm2*<sup>fl/fl</sup> mouse model and observed some interesting transcriptional effects on  
582 HIF1 $\alpha$  target genes such as *Ldha*. This Cre model differs from the one utilised in our  
583 current study as using the *Ncr1* Cre model involves deletion of PKM2 *in vivo* and  
584 during the immature stage of NK cell development<sup>17</sup>. It is possible that deletion of  
585 PKM2 during NK cell development *in vivo* in this study may allow for selection for cells  
586 that have PKM2-independent transcriptional programs. It is also possible to speculate  
587 that earlier deletion of PKM2, for example, in haematopoietic progenitor stage using a  
588 *Vav* cre model may reveal an interesting developmental phenotype<sup>33</sup>.

589 The combination of genetic and pharmacological approaches is important for studying  
590 metabolic systems and while each has its limitations, they combine to provide  
591 confidence in the overall results and conclusions. Herein, both approaches show the  
592 PKM2 does not critically regulate the NK cell transcriptome. However, both genetic  
593 and pharmacological approaches support an important metabolic role for PKM2 in NK  
594 cells. In PKM2<sup>NK-WT</sup> cells the recalibration of PKM1 levels indicates the importance of  
595 maintaining exact pyruvate kinase activity. Acute activation of PKM2 using TEPP-46



596 showed that controlling pyruvate kinase activity is important as it supports flux through  
597 the PPP to maintain redox balance in NK cells. Rerouting of glucose into the PPP has  
598 been shown to occur immediately after oxidative injury in skin cells<sup>34</sup> and PPP-  
599 controlled anti-oxidant response has also been shown to be important in the control of  
600 inflammatory macrophage responses<sup>35</sup>. Similarly CD4+ T cells from patients with  
601 rheumatoid arthritis (RA) divert glucose into the PPP to increase NADPH production  
602 for protection against ROS. This allows these RA-associated T cells to bypass normal  
603 cell cycle control points and to become hyperinflammatory<sup>36</sup>. These studies indicate  
604 that there is an intricate relationship between PPP-derived antioxidants and immune  
605 function. Interestingly, PKM2 has been shown to be a key regulator of antioxidant  
606 defence in esophageal squamous cell carcinoma, through direction regulation of flux  
607 into the PPP<sup>37</sup>.

608 We have demonstrated that PKM2-controlled metabolism is required for normal NK  
609 cell responses as treatment with TEPP-46 is detrimental to the production of a range  
610 of NK cell cytokines including IFN $\gamma$  and TNF $\alpha$ . Moreover, mitochondrial damage<sup>38</sup> or  
611 directly targeting OXPHOS using pharmacological inhibitors has also been shown to  
612 inhibit NK cell cytokine production<sup>3, 5</sup> and accordingly we found that one metabolic  
613 consequence of TEPP-46 treatment is the inhibition of mitochondrial OXPHOS.

614 TEPP-46 has been tested as an anti-tumour drug, whereby it has been shown to inhibit  
615 tumour growth in xenograft models in *nu/nu* mice which lack a functional immune  
616 system<sup>15</sup>. However, it is important to consider the impact that such therapies would  
617 have for the anti-tumour immune responses. Although TEPP-46 showed some  
618 promise in preventing tumour growth, it is tempting to speculate that its efficacy may  
619 be hindered in mouse models with complete immune systems. As shown in this study,  
620 TEPP-46 is detrimental to NK cell metabolism and function. Similarly TEPP-46 has

621 been shown to be anti-inflammatory in EAE models <sup>23</sup>. Therefore, PKM2 targeting  
622 therapies may not be suitable for treating cancer unless they can be specifically  
623 targeted to tumour cells.

624

## 625 **Contributions**

626 J.F.W conceived and performed experiments, and wrote the manuscript. D.K.F,  
627 D.W.M and C.G. provided supervision, contributed to study design, wrote the  
628 manuscript and secured funding. J.J.S. contributed to study design and provided  
629 expertise. E.M.P. performed experiments and conducted analysis. M.G.C assisted  
630 with RNAseq analysis.

## 631 **Acknowledgements**

632 J.F. W was funded, in part, by a Wellcome Trust PhD Studentship (106811/Z/15/Z).  
633 This research was supported in part by the Intramural Research Program of the NIH,  
634 National Cancer Institute, Center for Cancer Research.

635

## 636 **References**

637

- 638 1. Assmann, N. *et al.* Srebp-controlled glucose metabolism is essential for NK cell  
639 functional responses. *Nat Immunol* **18**, 1197-1206 (2017).  
640
- 641 2. Donnelly, R.P. *et al.* mTORC1-dependent metabolic reprogramming is a prerequisite  
642 for NK cell effector function. *Journal of immunology (Baltimore, Md. : 1950)* **193**, 4477-  
643 4484 (2014).  
644
- 645 3. Keating, S.E. *et al.* Metabolic Reprogramming Supports IFN-gamma Production by  
646 CD56bright NK Cells. *J Immunol* **196**, 2552-2560 (2016).  
647
- 648 4. Loftus, R.M. *et al.* Amino acid-dependent cMyc expression is essential for NK cell  
649 metabolic and functional responses in mice. *Nat Commun* **9**, 2341 (2018).  
650

- 651 5. Kedia-Mehta, N. *et al.* Natural Killer Cells Integrate Signals Received from Tumour  
652 Interactions and IL2 to Induce Robust and Prolonged Anti-Tumour and Metabolic  
653 Responses. *Immunometabolism* **1**, e190014 (2019).  
654
- 655 6. Ho, P.C. *et al.* Phosphoenolpyruvate Is a Metabolic Checkpoint of Anti-tumor T Cell  
656 Responses. *Cell* **162**, 1217-1228 (2015).  
657
- 658 7. Chang, C.H. *et al.* Posttranscriptional control of T cell effector function by aerobic  
659 glycolysis. *Cell* **153**, 1239-1251 (2013).  
660
- 661 8. Christofk, H.R. *et al.* The M2 splice isoform of pyruvate kinase is important for cancer  
662 metabolism and tumour growth. *Nature* **452**, 230-233 (2008).  
663
- 664 9. Li, Y.H. *et al.* PKM2, a potential target for regulating cancer. *Gene* **668**, 48-53 (2018).  
665
- 666 10. Hitosugi, T. *et al.* Tyrosine phosphorylation inhibits PKM2 to promote the Warburg  
667 effect and tumor growth. *Science signaling* **2**, ra73 (2009).  
668
- 669 11. Demaria, M. & Poli, V. PKM2, STAT3 and HIF-1alpha: The Warburg's vicious circle. *Jak-*  
670 *stat* **1**, 194-196 (2012).  
671
- 672 12. Dong, G. *et al.* PKM2 and cancer: The function of PKM2 beyond glycolysis. *Oncol Lett*  
673 **11**, 1980-1986 (2016).  
674
- 675 13. Keller, K.E., Tan, I.S. & Lee, Y.S. SAICAR stimulates pyruvate kinase isoform M2 and  
676 promotes cancer cell survival in glucose-limited conditions. *Science (New York, N.Y.)*  
677 **338**, 1069-1072 (2012).  
678
- 679 14. Morgan, H.P. *et al.* M2 pyruvate kinase provides a mechanism for nutrient sensing and  
680 regulation of cell proliferation. *Proceedings of the National Academy of Sciences of the*  
681 *United States of America* **110**, 5881-5886 (2013).  
682
- 683 15. Anastasiou, D. *et al.* Pyruvate kinase M2 activators promote tetramer formation and  
684 suppress tumorigenesis. *Nature chemical biology* **8**, 839-847 (2012).  
685
- 686 16. Israelsen, William J. *et al.* PKM2 Isoform-Specific Deletion Reveals a Differential  
687 Requirement for Pyruvate Kinase in Tumor Cells. *Cell* **155**, 397-409 (2013).  
688
- 689 17. Narni-Mancinelli, E. *et al.* Fate mapping analysis of lymphoid cells expressing the  
690 Nkp46 cell surface receptor. *Proceedings of the National Academy of Sciences* **108**,  
691 18324-18329 (2011).  
692
- 693 18. Tanaka, K., Sawamura, S., Satoh, T., Kobayashi, K. & Noda, S. Role of the Indigenous  
694 Microbiota in Maintaining the Virus-Specific CD8 Memory T Cells in the Lung of Mice  
695 Infected with Murine Cytomegalovirus. *The Journal of Immunology* **178**, 5209-5216  
696 (2007).  
697

- 698 19. Lucas, M., Schachterle, W., Oberle, K., Aichele, P. & Diefenbach, A. Dendritic cells  
699 prime natural killer cells by trans-presenting interleukin 15. *Immunity* **26**, 503-517  
700 (2007).  
701
- 702 20. Dubois, S., Mariner, J., Waldmann, T.A. & Tagaya, Y. IL-15Ralpha recycles and presents  
703 IL-15 In trans to neighboring cells. *Immunity* **17**, 537-547 (2002).  
704
- 705 21. Koka, R. *et al.* Cutting edge: murine dendritic cells require IL-15R alpha to prime NK  
706 cells. *J Immunol* **173**, 3594-3598 (2004).  
707
- 708 22. Narni-Mancinelli, E. *et al.* Fate mapping analysis of lymphoid cells expressing the  
709 NKp46 cell surface receptor. *Proceedings of the National Academy of Sciences of the*  
710 *United States of America* **108**, 18324-18329 (2011).  
711
- 712 23. Angiari, S. *et al.* Pharmacological Activation of Pyruvate Kinase M2 Inhibits CD4+ T Cell  
713 Pathogenicity and Suppresses Autoimmunity. *Cell metabolism* **31**, 391-405.e398  
714 (2020).  
715
- 716 24. Ruttkay-Nedecky, B. *et al.* The role of metallothionein in oxidative stress. *Int J Mol Sci*  
717 **14**, 6044-6066 (2013).  
718
- 719 25. Palsson-McDermott, E.M. *et al.* Pyruvate kinase M2 regulates Hif-1alpha activity and  
720 IL-1beta induction and is a critical determinant of the warburg effect in LPS-activated  
721 macrophages. *Cell metabolism* **21**, 65-80 (2015).  
722
- 723 26. Zhang, Z. *et al.* PKM2, function and expression and regulation. *Cell & Bioscience* **9**, 52  
724 (2019).  
725
- 726 27. Mazurek, S. Pyruvate kinase type M2: a key regulator of the metabolic budget system  
727 in tumor cells. *The international journal of biochemistry & cell biology* **43**, 969-980  
728 (2011).  
729
- 730 28. Marçais, A. *et al.* The metabolic checkpoint kinase mTOR is essential for IL-15 signaling  
731 during the development and activation of NK cells. *Nat Immunol* **15**, 749-757 (2014).  
732
- 733 29. Mah, A.Y. *et al.* Glycolytic requirement for NK cell cytotoxicity and cytomegalovirus  
734 control. *JCI Insight* **2**, e95128 (2017).  
735
- 736 30. Mognol, G.P., de Araujo-Souza, P.S., Robbs, B.K., Teixeira, L.K. & Viola, J.P.  
737 Transcriptional regulation of the c-Myc promoter by NFAT1 involves negative and  
738 positive NFAT-responsive elements. *Cell cycle (Georgetown, Tex.)* **11**, 1014-1028  
739 (2012).  
740
- 741 31. Kono, M. *et al.* Pyruvate kinase M2 is requisite for Th1 and Th17 differentiation. *JCI*  
742 *Insight* **4** (2019).  
743

- 744 32. Zimmer, A.M., Pan, Y.K., Chandrapalan, T., Kwong, R.W.M. & Perry, S.F. Loss-of-  
745 function approaches in comparative physiology: is there a future for knockdown  
746 experiments in the era of genome editing? *The Journal of Experimental Biology* **222**,  
747 jeb175737 (2019).  
748
- 749 33. Georgiades, P. *et al.* VavCre transgenic mice: a tool for mutagenesis in hematopoietic  
750 and endothelial lineages. *Genesis (New York, N.Y. : 2000)* **34**, 251-256 (2002).  
751
- 752 34. Kuehne, A. *et al.* Acute Activation of Oxidative Pentose Phosphate Pathway as First-  
753 Line Response to Oxidative Stress in Human Skin Cells. *Molecular cell* **59**, 359-371  
754 (2015).  
755
- 756 35. Baardman, J. *et al.* A Defective Pentose Phosphate Pathway Reduces Inflammatory  
757 Macrophage Responses during Hypercholesterolemia. *Cell Rep* **25**, 2044-2052 e2045  
758 (2018).  
759
- 760 36. Yang, Z. *et al.* Restoring oxidant signaling suppresses proarthritogenic T cell effector  
761 functions in rheumatoid arthritis. *Science translational medicine* **8**, 331ra338 (2016).  
762
- 763 37. Fukuda, S. *et al.* Pyruvate Kinase M2 Modulates Esophageal Squamous Cell Carcinoma  
764 Chemotherapy Response by Regulating the Pentose Phosphate Pathway. *Annals of*  
765 *surgical oncology* **22 Suppl 3**, S1461-1468 (2015).  
766
- 767 38. Zheng, X. *et al.* Mitochondrial fragmentation limits NK cell-based tumor  
768 immunosurveillance. *Nat Immunol* **20**, 1656-1667 (2019).  
769  
770

## 771 Figure Legends

772 **Fig. 1:** PKM2 is expressed and is the predominant PKM isoform in activated murine  
773 NK cells **a** Wildtype C57Bl/6 mice were injected with saline (100  $\mu$ L), low dose poly(I:C)  
774 (100  $\mu$ g/100  $\mu$ L) or high dose poly(I:C) (200  $\mu$ g/100  $\mu$ L) I.P. Spleens were harvested  
775 24 hours post-injection and PKM2 expression was analysed by intracellular flow  
776 cytometry in NK1.1<sup>+</sup> NKp46<sup>+</sup> cells **b** NK cell cultures were activated with IL-2/12 for 48  
777 hours and cells were lysed for protein and mRNA. Samples were analysed by  
778 immunoblot for PKM2 and SMC1 protein expression. mRNA samples were subjected  
779 to qPCR analysis and *Pkm2* expression over time was determined relative to time  
780 zero. Data was normalised to housekeeping gene *Rplp0*. **c** Cultured NK cells were  
781 stimulated for 18 hours in IL-2/12 +/- rapamycin. After 18 hours cells were harvested  
782 for protein and mRNA. Samples were analysed by immunoblot for PKM2,  $\beta$ -Actin, total  
783 S6 and pS6. mRNA samples were subjected to qPCR analysis for *Pkm2* expression.  
784 Data was normalised to housekeeping gene *Rplp0*. **D** Levels of individual peptides for  
785 PKM1 and PKM2 were compared using quantitative proteomics. Data are mean +/-  
786 S.E.M for 4-5 mice per group in two individual experiments (**a**). Data were analysed  
787 using one way ANOVA with Tukey post-test 3 individual experiments (**b-d**), or are  
788 representative of 3 individual experiments (**b-d**). \*p>0.05, \*\*p>0.01, \*\*\*p>0.001.  
789

790

791 **Fig. 2.** PKM2 is not required for IL-2/12 induced NK cell effector function *in vitro*. **a** NK  
792 cells were sorted by flow cytometry (NK1.1<sup>+</sup>NKp46<sup>+</sup>CD3<sup>-</sup>CD49b<sup>+</sup>) from wildtype  
793 C57Bl/6, *Pkm2*<sup>fl/fl</sup> or *Ncr1*<sup>Cre</sup>*Pkm2*<sup>fl/fl</sup> mice. Cells were lysed and DNA was purified.  
794 DNA was subject to PCR amplification for the *Pkm2* gene and products were  
795 electrophoresed on a 1.8% agarose gel and imaged. **b** Splenic *Pkm2*<sup>NK-WT</sup> and  
796 PKM2<sup>NK-KO</sup> NK cells were analysed by flow cytometry for the expression of CD11b and  
797 CD27. **c** *Pkm2*<sup>NK-WT</sup> and *Pkm2*<sup>NK-KO</sup> cells were isolated and counted and analysed by  
798 flow cytometry for frequency of NK1.1<sup>+</sup>NKp46<sup>+</sup>CD3<sup>-</sup> cells. **d** Splenic *Pkm2*<sup>NK-WT</sup> and  
799 *Pkm2*<sup>NK-WT</sup> cells were expanded for 6 days in IL-15 (15 ng/mL). Data displayed show  
800 total splenocyte numbers before expansion (pre) and pure NK cell numbers after  
801 magnetic purification (pure). **e-h** *Pkm2*<sup>WT</sup> and *Pkm2*<sup>KO</sup> NK cells were stimulated for 18  
802 hours in IL-2/12 or left unstimulated. NK1.1<sup>+</sup>NKp46<sup>+</sup>CD3<sup>-</sup> cells were analysed for  
803 granzyme B (e-f) or IFN $\gamma$  expression (g-h). **i-j** *Pkm2*<sup>NK-WT</sup> and *Pkm2*<sup>NK-KO</sup> cells were  
804 stimulated for 18 hours in IL-2/12 or left unstimulated and media supernatants were  
805 collected. Supernatants were then analysed for by cytometric bead array analysis for  
806 **i** IFN $\gamma$ , IL-10, TNF, **j** MIP1 $\alpha$ , MIP1 $\beta$ . **b-j** data are mean +/- S.E.M for n=4-6 mice per  
807 group. **c** Data was analysed using a Students t test. **b, d-i** Data were analysed by two-  
808 way ANOVA with multiple comparisons. \*p>0.05, \*\*p>0.01, \*\*\*p>0.001.

809

810

811 **Fig. 3.** PKM2 is not required for early NK cell responses to MCMV. *Pkm2*<sup>NK-WT</sup> and  
812 *Pkm2*<sup>NK-KO</sup> mice were infected with 1 x 10<sup>5</sup> PFU of MCMV or injected with saline for 4  
813 days. **a** Spleens were harvested from *Pkm2*<sup>NK-WT</sup> and *Pkm2*<sup>NK-KO</sup> mice 4 days post  
814 MCMV infection and weighed. **b** Spleens were harvested 4 days post-MCMV infection  
815 from *Pkm2*<sup>NK-WT</sup> and *Pkm2*<sup>NK-KO</sup> mice and NK cells were identified as being  
816 NK1.1<sup>+</sup>NKp46<sup>+</sup>CD3<sup>-</sup> by flow cytometry. **c** Ly49H positive cells were assessed by flow  
817 cytometry and expressed as a percentage of total splenocytes **d-e** Splenic NK cells  
818 from *Pkm2*<sup>NK-WT</sup> and *Pkm2*<sup>NK-KO</sup> mice were identified post MCMV infection and  
819 assessed for CD69 expression by flow cytometry **f** Ly49H<sup>+</sup> cells from MCMV infected  
820 *Pkm2*<sup>NK-WT</sup> and *Pkm2*<sup>NK-KO</sup> mice were assessed for BrDU incorporation 4 days post  
821 infection **g** Representative dot plot of BrDU incorporation into Ly49H<sup>+</sup> cells 4 days post  
822 MCMV infection. **h** blood was drawn from *Pkm2*<sup>NK-WT</sup> and *Pkm2*<sup>NK-KO</sup> by cardiac  
823 puncture 4 days post MCMV infection and serum was isolated. Serum was then  
824 analysed for levels of cytokines by cytometric bead array for IL-10, TNF and IFN $\gamma$ . **i**  
825 Splenic viral load was measured using qPCR for MCMV-IE and DNA was normalised  
826 to  $\beta$ -Actin. n=4-5 mice per group and are representative of two independent  
827 experiments. Data were analysed by two-way ANOVA with multiple comparisons. ns  
828 – not significant \*p>0.05, \*\*p>0.01, \*\*\*p>0.001.

829

830 **Fig.4.** Transcriptional regulation of PKM1 can metabolically compensate for loss of  
831 PKM2. **a** *Pkm2*<sup>NK-WT</sup> and *Pkm2*<sup>NK-KO</sup> splenocytes were cultured for 6 days in low dose  
832 IL-15 and NK cells were magnetically purified. NK cells were then stimulated for 18  
833 hours in IL-2/12 or left unstimulated. **a-e** Stimulated or unstimulated *Pkm2*<sup>NK-WT</sup> and  
834 *Pkm2*<sup>NK-KO</sup> cells were analysed by seahorse for glycolysis and oxphos **a** *Pkm2*<sup>NK-WT</sup>  
835 and *Pkm2*<sup>NK-KO</sup> cells were stimulated with (IL-2/12) or left unstimulated (low dose IL-  
836 15) and oxygen consumption was measured over time. Data is representative OCR  
837 trace. **b** bar graph of pooled data for basal rates of OxPhos. **c** bar graph of maximum  
838 rates of OxPhos in *Pkm2*<sup>NK-WT</sup> and *Pkm2*<sup>NK-KO</sup> treated with IL-2/12 or left unstimulated  
839 **d** *Pkm2*<sup>NK-WT</sup> and *Pkm2*<sup>NK-KO</sup> cells were stimulated with (IL-2/12) or left unstimulated

840 (low dose IL-15) and extracellular acidification was measured over time. Data is  
841 representative ECAR trace. **f-h** *Pkm2*<sup>NK-WT</sup> and *Pkm2*<sup>NK-KO</sup> cells were stimulated with  
842 (IL-2/12) or left unstimulated (low dose IL-15) and cells were analysed for relative  
843 metabolite abundance using LC-MS metabolomics. Peak areas were normalised to  
844 the average of *Pkm2*<sup>NK-WT</sup> unstimulated samples and then log(y) transformed using  
845 Graphpad Prism. **f** Data displayed are metabolites of the pentose phosphate pathway  
846 determined using LC-MS metabolomics. **g** Data displayed are a heat map for relative  
847 abundance of tricarboxylic cycle metabolites determined using LC-MS metabolomics.  
848 **h** Data displayed are a heat map for relative abundance of glycolytic metabolites  
849 determined using LC-MS metabolomics. **i** *Pkm2*<sup>NK-WT</sup> and *Pkm2*<sup>NK-KO</sup> cells were  
850 stimulated with (IL-2/12) or left unstimulated (low dose IL-15) and cells were analysed  
851 by immunoblot or qPCR for the expression of PKM1 or PKM2. The same western blot  
852 was stripped and re-probed for PKM2 and the same loading control  $\beta$ -actin is pictured  
853 for both. qPCR data was normalised using the  $\Delta\Delta$ Ct method and HPRT housekeeping  
854 gene was used. **k** RNA sequencing for the quantity of transcripts encoding *Pkm1* and  
855 *Pkm2*. **m** *Pkm2*<sup>NK-WT</sup> and *Pkm2*<sup>NK-KO</sup> cells were stimulated with (IL-2/12) or left  
856 unstimulated (low dose IL-15) and cells were lysed and assessed using a fluorescent  
857 assay for total pyruvate kinase activity. n=3-5 mice per group. Data are mean +/-  
858 S.E.M and were analysed by **a-h** two-way ANOVA with multiple comparisons or **i-j** one  
859 way ANOVA with Tukey post-test. ns – not significant \*p>0.05, \*\*p>0.01, \*\*\*p>0.001.

860  
861

862 **Fig. 5.** PKM2 is not required for transcription of HIF1 $\alpha$  and STAT5 $\alpha$  target genes in  
863 NK cells. **a-c** *Pkm2*<sup>NK-WT</sup> and *Pkm2*<sup>NK-KO</sup> cultured and purified cells were stimulated  
864 with (IL-2/12) or left unstimulated (low dose IL-15) for 18 hours. HiSeq RNA  
865 sequencing was then performed. **a** Differential gene expression analysis was carried  
866 out to assess total gene changes between IL-2/12 stimulated *Pkm2*<sup>NK-WT</sup> and *Pkm2*<sup>NK-</sup>  
867 <sup>KO</sup> cells. Total gene changes were assessed at a fold change cut-off of 2 and a p value  
868 of 0.05 with an FDR of 0.05. **c** Expression levels of key HIF1 $\alpha$  target genes were  
869 assessed and compared between *Pkm2*<sup>NK-WT</sup> and *Pkm2*<sup>NK-KO</sup> cells **c** Expression levels  
870 of key STAT5 target genes were assessed and compared between *Pkm2*<sup>NK-WT</sup> and  
871 *Pkm2*<sup>NK-KO</sup> cells **d-f** Cultured wildtype NK cells were stimulated with IL-2/12 +/- TEPP-  
872 46/vehicle for 18 hours. HiSeq RNA sequencing was then performed. **d** Differential  
873 gene expression analysis was carried out to assess total gene changes between IL-  
874 2/12 TEPP-46 (50  $\mu$ M) and IL-2/12 Vehicle (0.1% v/v DMSO). Total gene changes  
875 were assessed at a fold change cut-off of 2 and a p value of 0.05 with FDR 0.05. **e**  
876 Expression levels of key HIF1 $\alpha$  target genes were assessed and compared between  
877 IL-2/12 TEPP-46 (50  $\mu$ M) and IL-2/12 Vehicle (0.1% v/v DMSO) treated cells. **f**  
878 Expression levels of key STAT5 target genes were assessed and compared between  
879 IL-2/12 TEPP-46 (50  $\mu$ M) and IL-2/12 Vehicle (0.1% v/v DMSO) treated cells. Data  
880 are from n=3 biological replicates per group and are displayed as mean values. **b-c**  
881 RPKM values were normalised to the average of *Pkm*<sup>NK-WT</sup> unstimulated. Fold change  
882 values were then log transformed and displayed in heat maps. **e-f** RPKM values were  
883 normalised to the mean of both groups combined and then converted to fold change  
884 from the mean. Data were then log transformed and displayed as heat maps. n=3 mice  
885 per group. Data are mean +/- S.E.M and were analysed by **a-c** two-way ANOVA with  
886 multiple comparisons or **d-f** one way ANOVA with Tukey post-test. ns – not significant  
887 \*p>0.05  
888

889 **Fig. 6.** TEPP-46 activation of PKM2 is inhibitory to NK cell proinflammatory cytokine  
890 production. **a** wildtype cultured NK cells were stimulated for 17 hours in IL-2/12 or left  
891 unstimulated. NK cells were then treated with TEPP-46 for one hour, lysed and a  
892 pyruvate kinase activity assay was carried out. **b** wildtype cultured NK cells were  
893 stimulated for 17 hours in IL-2/12 or left unstimulated. NK cells were then treated with  
894 TEPP-46 for one hour and glycolysis was assessed by Seahorse extracellular flux  
895 analysis **c** pooled data for basal glycolysis and glycolytic capacity as measured by  
896 seahorse extracellular flux analysis **d** Cultured NK cells were stimulated with IL-2/12  
897 for 18 hours +/- TEPP-46 (50  $\mu$ M) and analysed by flow cytometry for Annexin V  
898 staining and PI incorporation. **e** Cultured NK cells were stimulated with IL-2/12 for 18  
899 hours +/- TEPP-46 (50  $\mu$ M) or left unstimulated and analysed by flow cytometry for  
900 frequency of IFN $\gamma$  expression **f** Cultured NK cells were stimulated with IL-2/12 for 18  
901 hours +/- TEPP-46 (50  $\mu$ M) or left unstimulated and analysed by flow cytometry for  
902 granzyme B expression **g** Cultured NK cells were stimulated with IL-2/12 for 18 hours  
903 +/- TEPP-46 (50  $\mu$ M) or left unstimulated. Supernatants were harvested and analysed  
904 for levels of proinflammatory cytokines (TNF, IFN $\gamma$ , IL-10) by flow cytometric bead  
905 array. **h** Cultured NK cells were stimulated with IL-2/12 for 18 hours +/- TEPP-46 (50  
906  $\mu$ M) or left unstimulated. Supernatants were harvested and analysed for levels of  
907 chemokines (MIP1 $\alpha$  and MIP1 $\beta$ ) by flow cytometric bead array. **a-d** data are  
908 representative of 3 independent experiments. **e** data are pooled data of 9 experiments  
909 **f** data are pooled data of 6 experiments **g-h** data are pooled data of 7 individual  
910 experiments. Data are mean +/- S.E.M and were analysed by **a-c** two-way ANOVA  
911 with multiple comparisons or **d-f** one way ANOVA with Tukey post-test. ns – not  
912 significant \* $p > 0.05$ , \*\* $p > 0.01$ , \*\*\* $p > 0.001$ .

913  
914 **Fig. 7.** PKM2 activation inhibits normal cell growth and pentose phosphate pathway  
915 fueling **a** Cultured NK cells were stimulated with IL-2/12 for 18 hours +/- TEPP-46  
916 (50 $\mu$ M) or left unstimulated. NK cells were analysed by flow cytometry and forward  
917 scatter (FSC-A) was assessed **b-c** Cultured NK cells were stimulated with IL-2/12 for  
918 18 hours +/- TEPP-46 (50  $\mu$ M) and analysed for glycolysis by Seahorse extracellular  
919 flux analysis **b** representative seahorse trace for IL-2/12 stimulated NK cells +/-TEPP-  
920 46 (18hrs) **c** IL-2/12 stimulated NKs treated +/- TEPP-46 (18hrs) were analysed by  
921 Seahorse extracellular flux analysis and data were compiled for glycolytic capacity and  
922 pooled basal glycolysis. **d** Cultured NK cells were stimulated with IL-2/12 for 18 hours  
923 +/- TEPP-46 (50mM) and analysed by metabolomics for glycolytic metabolites using  
924 GC-MS metabolomics. Data were normalised to the mean of each metabolite peak  
925 height across both groups and displayed as fold change relative to the mean. **e**  
926 metabolomics analysis for the metabolite ribose-5-phosphate displayed as peak  
927 height. Data are pooled or representative of between 3-5 individual experiments. Data  
928 were analysed by a Students t test (b) or by one way ANOVA with Tukey post-test (e)  
929 Data are representative of mean +/- S.E.M. ns – not significant \* $p > 0.05$ , \*\* $p > 0.01$ ,  
930 \*\*\* $p > 0.001$ .

931  
932  
933 **Fig. 8.** PKM2 activation inhibits normal NK cell oxidative metabolism fuelling  
934 **a** Cultured NK cells were stimulated with IL-2/12 for 18 hours +/- TEPP-46 (50 $\mu$ M) or  
935 left unstimulated (low dose IL-15) and stained for ROS using the flow cytometric probe  
936 DCFDA. NK cells were gated (NK1.1<sup>+</sup>NKp46<sup>+</sup>CD3<sup>-</sup>) and MFI for DCFDA was analysed  
937 and displayed as both a representative histogram and pooled data from 7 individual



938 experiments. **b** Cultured NK cells were stimulated with IL-2/12 for 18 hours +/- DHEA  
939 (75  $\mu$ M) or vehicle and stained for ROS using the flow cytometric probe DCFDA. NK  
940 cells were gated (NK1.1<sup>+</sup>NKp46<sup>+</sup>CD3<sup>-</sup>) and MFI for DCFDA was analysed and  
941 displayed as both a representative histogram and pooled data from 5 individual  
942 experiments. **c** Cultured NK cells were stimulated with IL-2/12 for 18 hours +/- TEPP-  
943 46 (50  $\mu$ M) or left unstimulated (low dose IL-15). Cells were lysed and assessed for  
944 NADPH levels using a luminescent NADPH assay with  $0.15 \times 10^6$  cells with three  
945 technical replicates per assay. Data are pooled data of three independent  
946 experiments. **d** Cultured wildtype NK cells were stimulated with IL-2/12 +/- TEPP-  
947 46/vehicle (0.1% DMSO) for 18 hours. HiSeq RNA sequencing was then performed.  
948 Expression levels for the genes *Mt1* and *Mt2* are displayed as RPKM (Reads Per  
949 Kilobase of transcript, per Million mapped reads) and are pooled data from 3 individual  
950 experiments). **e** Cultured NK cells were stimulated with IL-2/12 for 18 hours +/- TEPP-  
951 46 (50 $\mu$ M) or vehicle and using the flow cytometric probe Mitotracker red. NK cells  
952 were gated (NK1.1<sup>+</sup>NKp46<sup>+</sup>CD3<sup>-</sup>) and MFI for mitotracker was analysed and displayed  
953 as both a representative histogram and relative pooled data from 6 individual  
954 experiments **f-h** Cultured NK cells were stimulated with IL-2/12 for 18 hours +/- TEPP-  
955 46 (50  $\mu$ M) and analysed for oxygen consumption by Seahorse extracellular flux  
956 analysis **f** representative seahorse trace for IL-2/12 stimulated NK cells +/-TEPP-46  
957 (18 hrs) **g-h** IL-2/12 stimulated NKs treated +/- TEPP-46 (18hrs) were analysed by  
958 Seahorse extracellular flux analysis and data were compiled for basal OCR and  
959 maximum respiratory capacity **i** Cultured NK cells were stimulated with IL-2/12 for 18  
960 hours +/- TEPP-46 (50  $\mu$ M) and analysed by metabolomics for tricarboxylic  
961 acid/citrate-malate shuttle metabolites using GC-MS metabolomics. Data were  
962 normalised to the mean of each metabolite peak height across both groups and  
963 displayed as fold change relative to the mean. **j** metabolomics analysis for the  
964 metabolite glutamine and glutamate displayed as peak height. One outlier was omitted  
965 from glutamine using a Grubbs test ( $\alpha = 0.05$ ). Data are pooled or representative of  
966 between 3-5 experiments. Data are representative of mean +/- S.E.M. (**a,c**) Data were  
967 analysed by one-way ANOVA with Tukey post-test. (b,d-e,g-j) data were analysed  
968 using students t test ns – not significant \* $p > 0.05$ , \*\* $p > 0.01$ , \*\*\* $p > 0.001$   
969

970

971

Figure 1

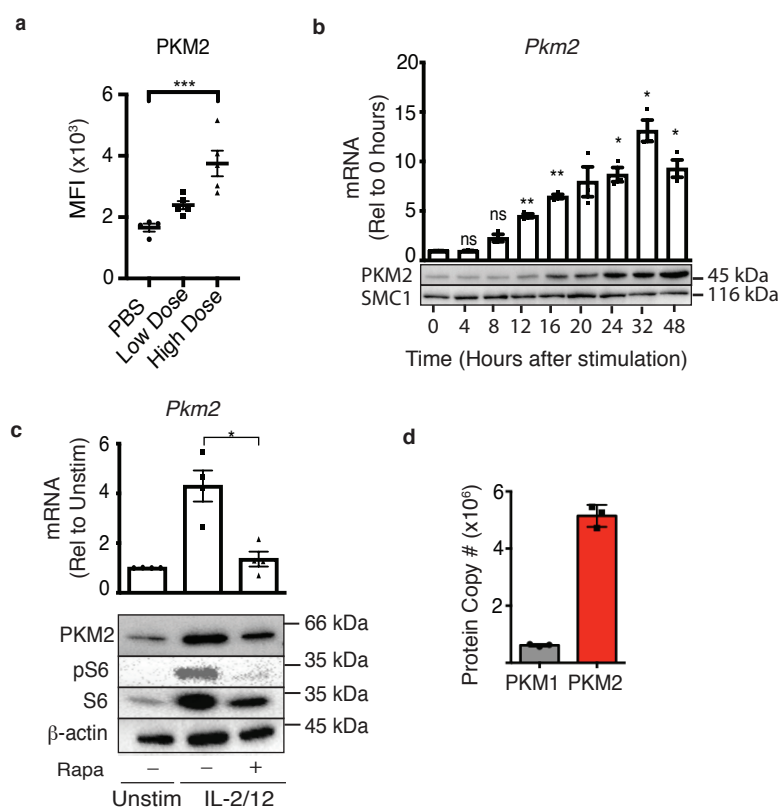

Figure 2

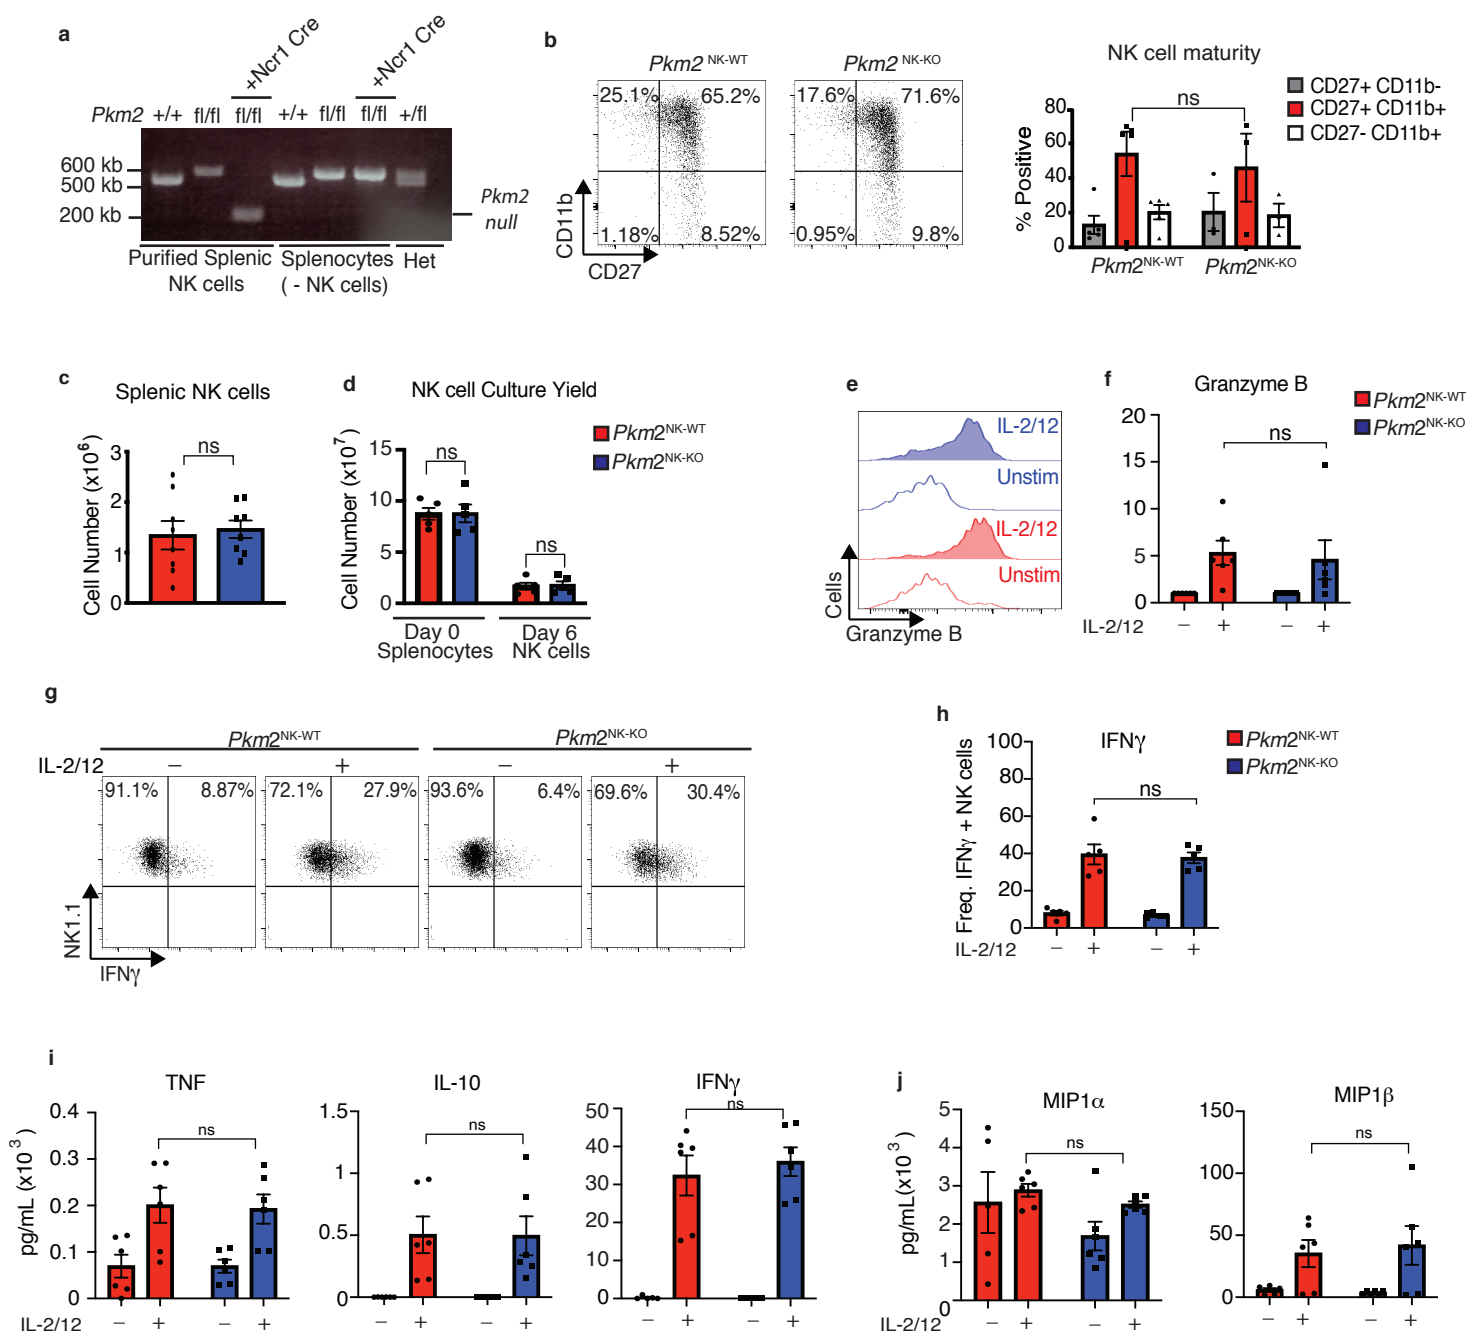

Figure 3

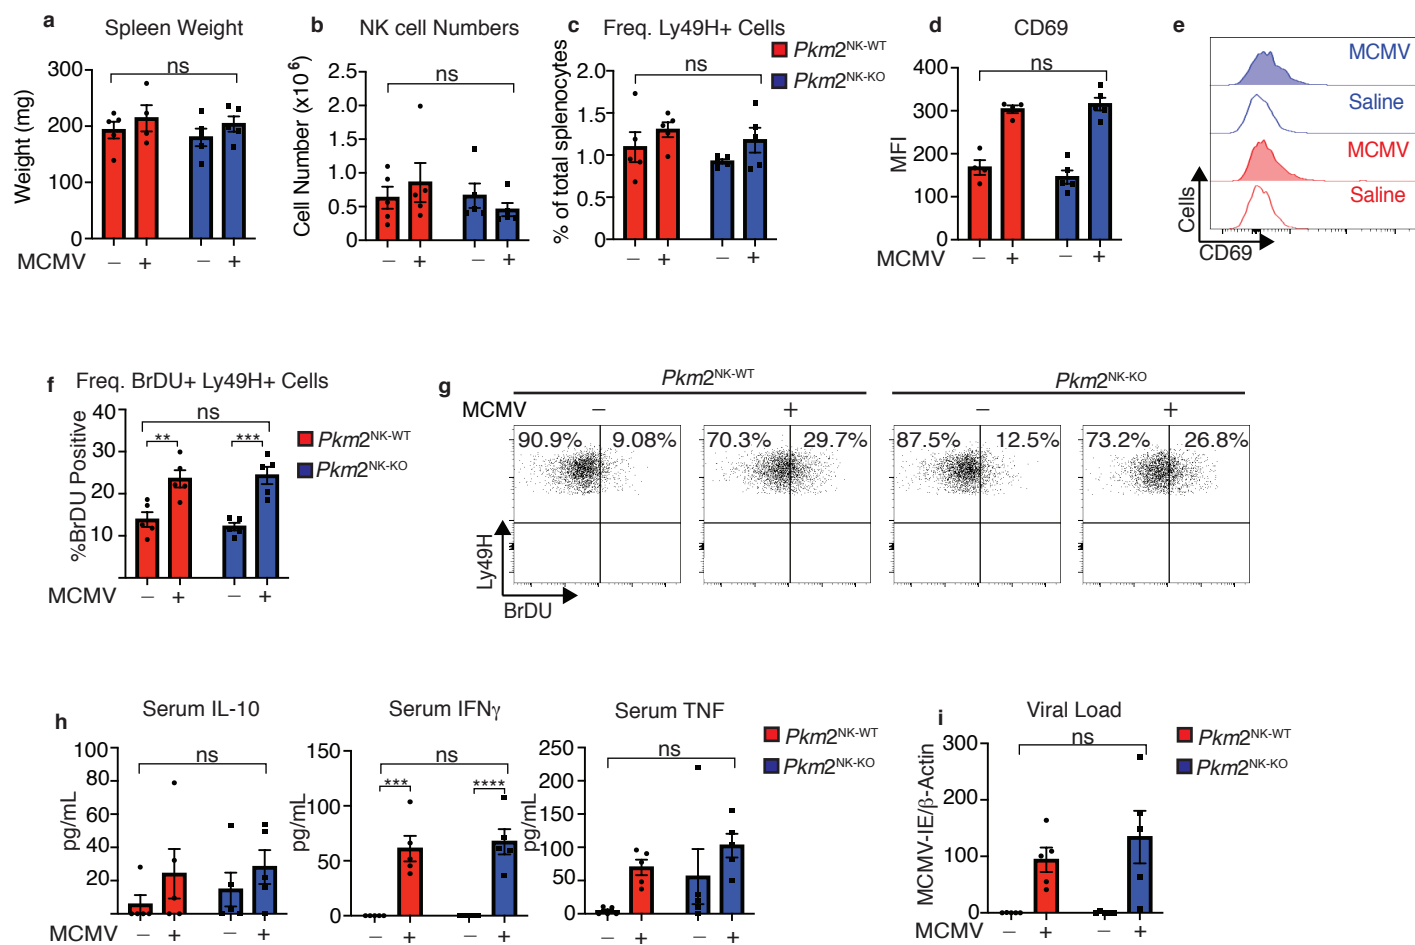

Figure 4

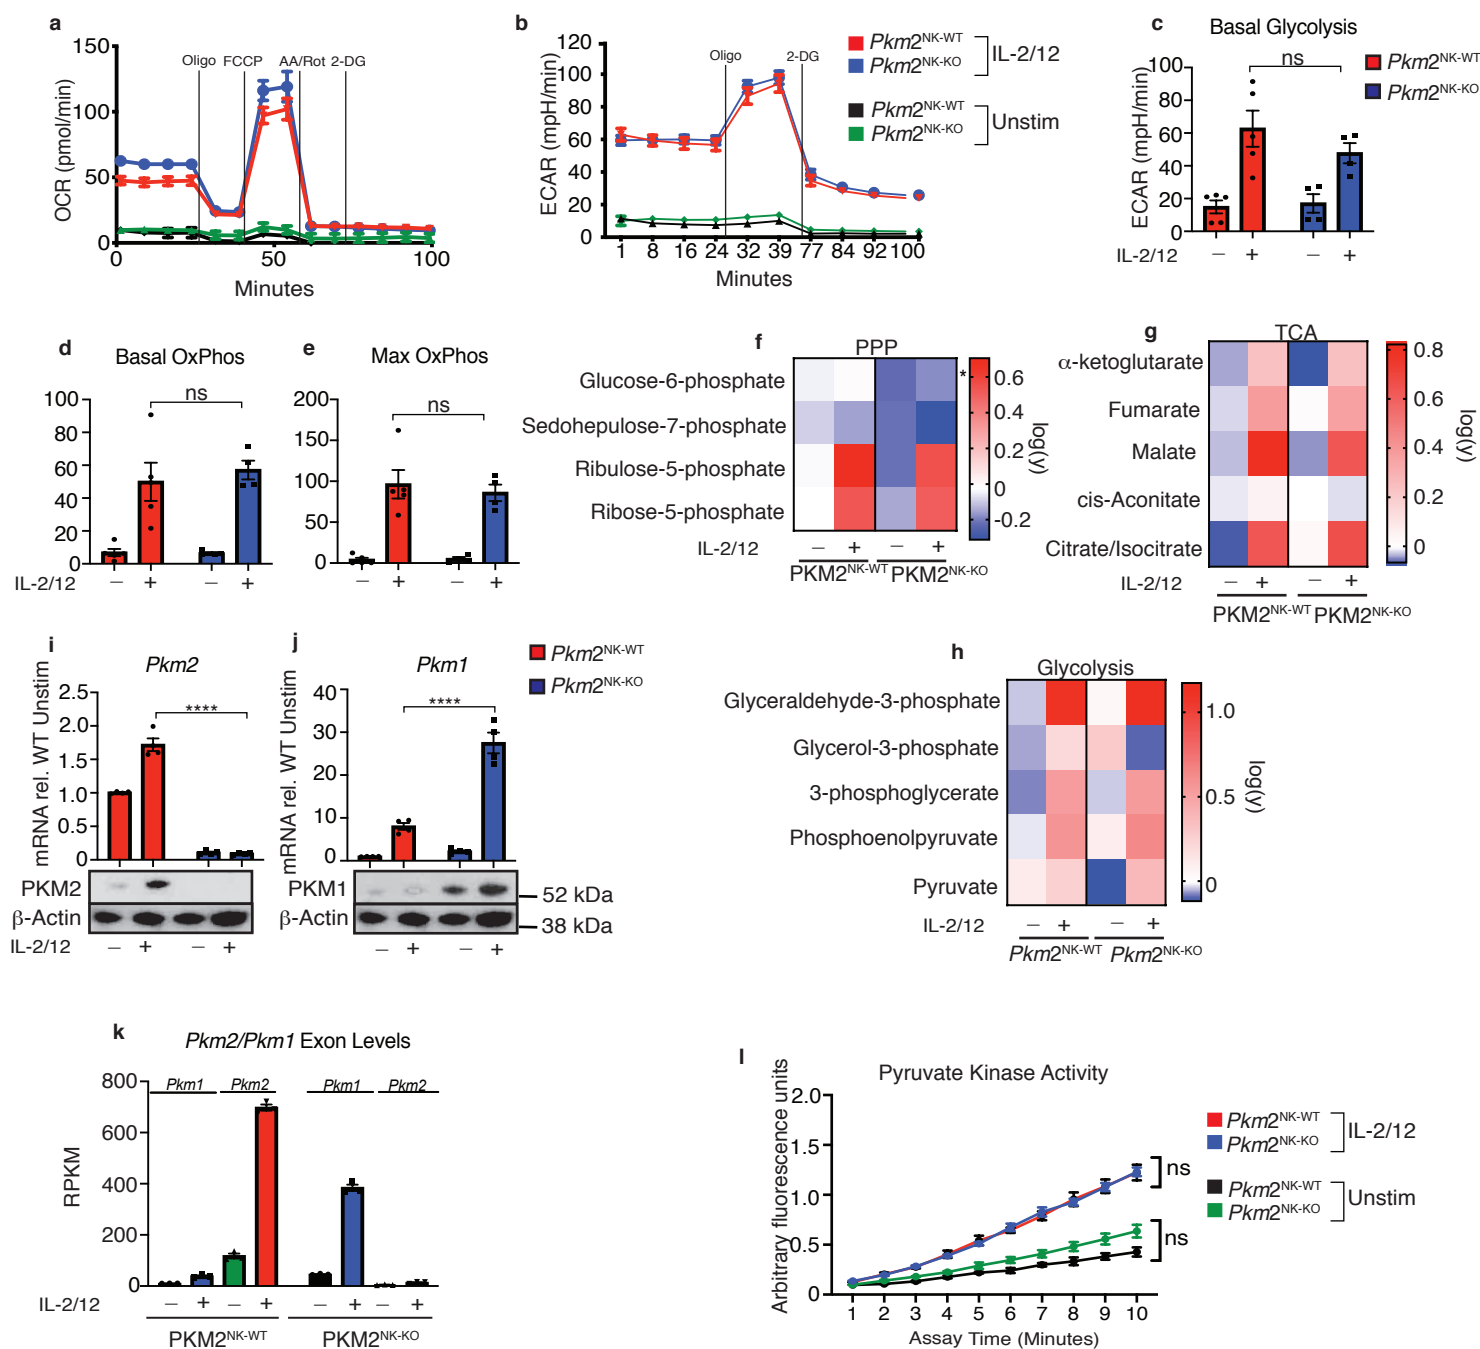

Figure 5

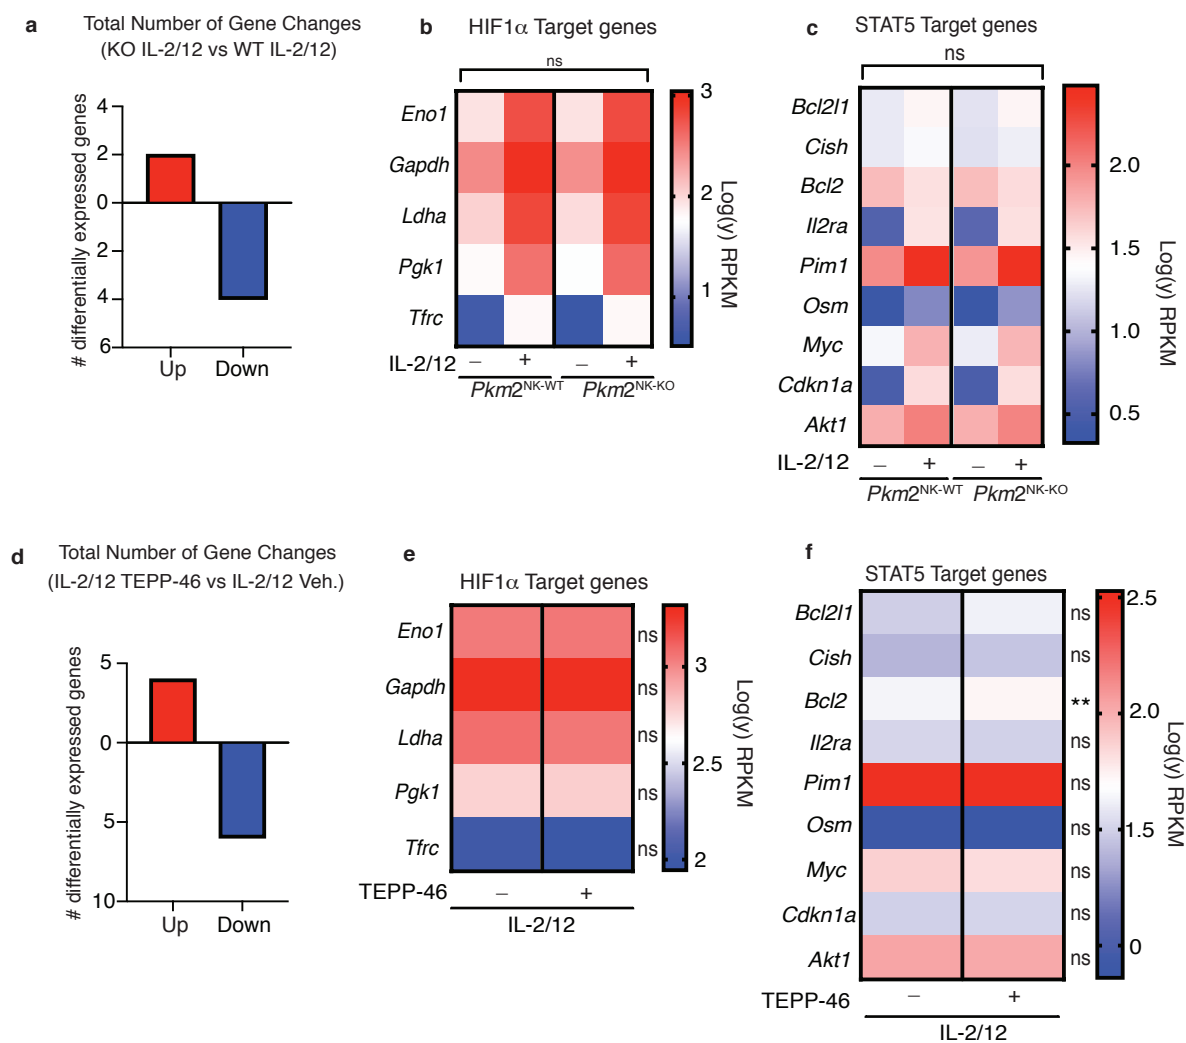

Figure 6

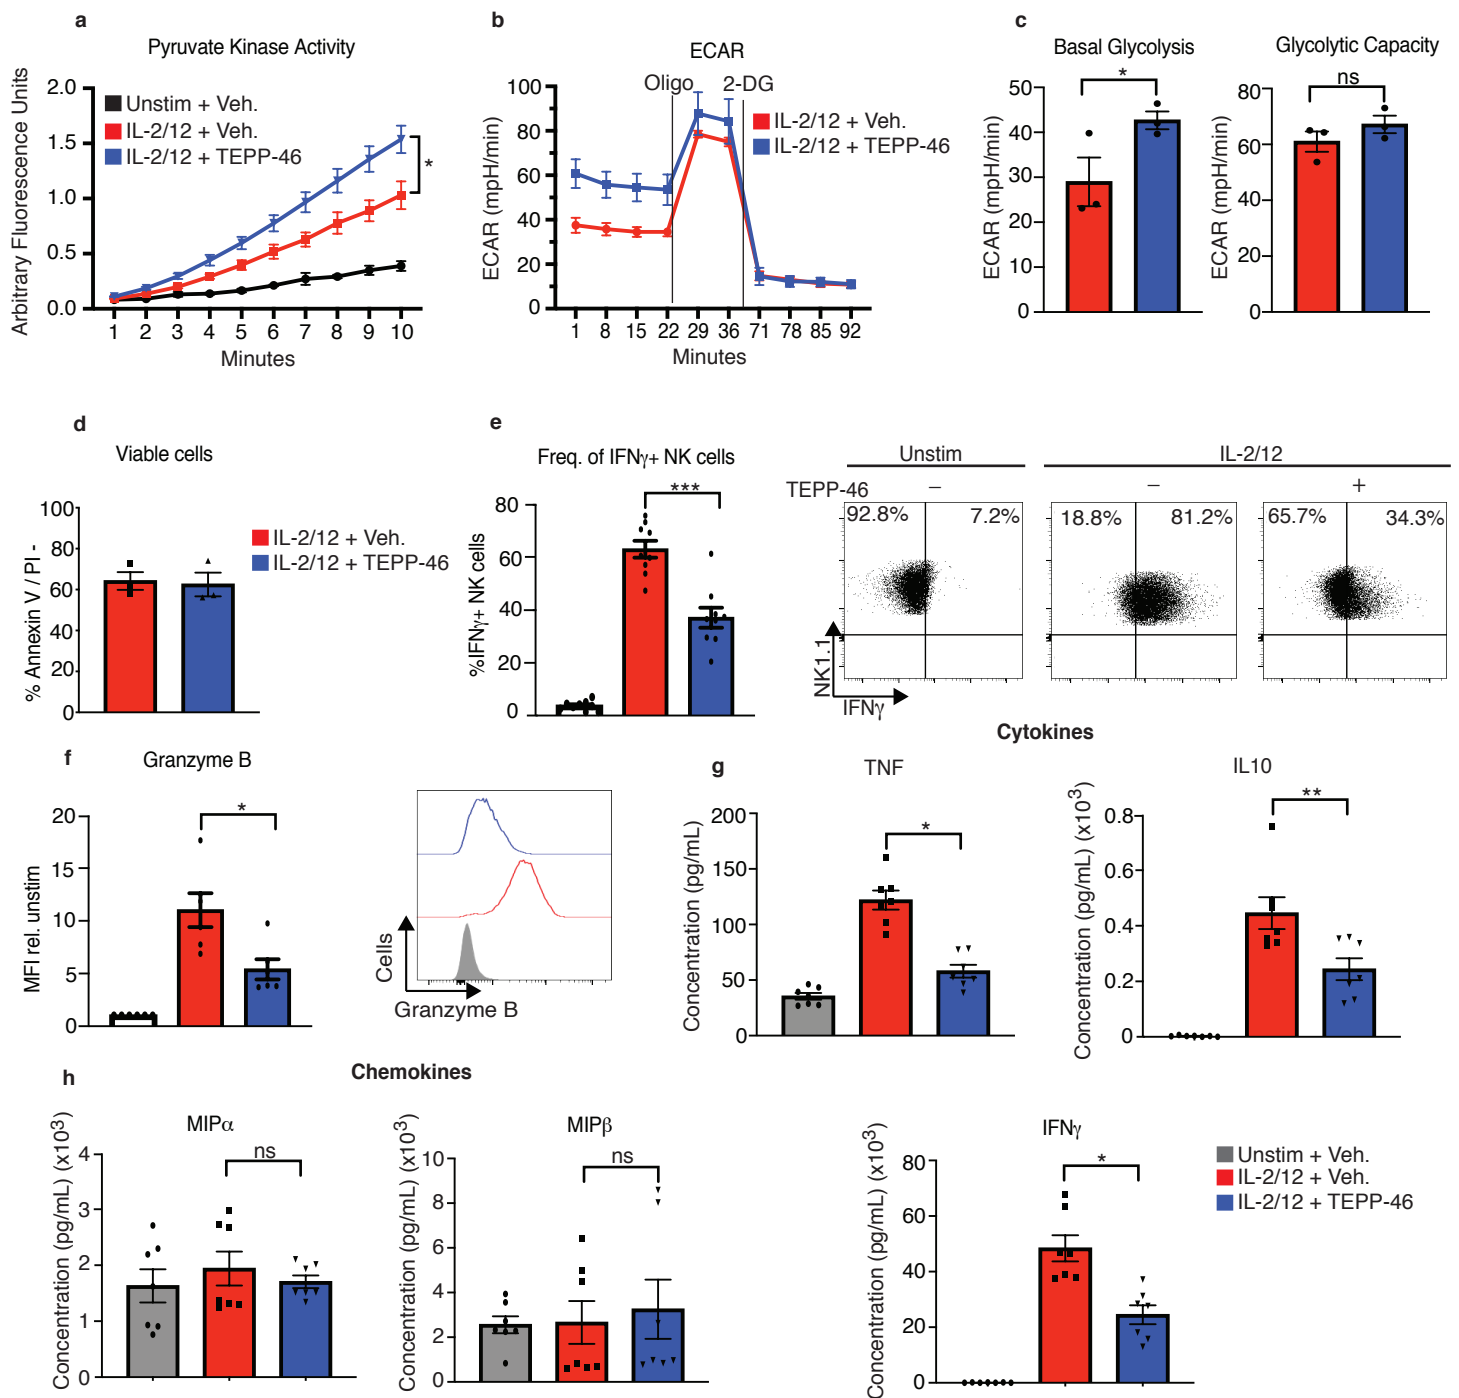

Figure 7

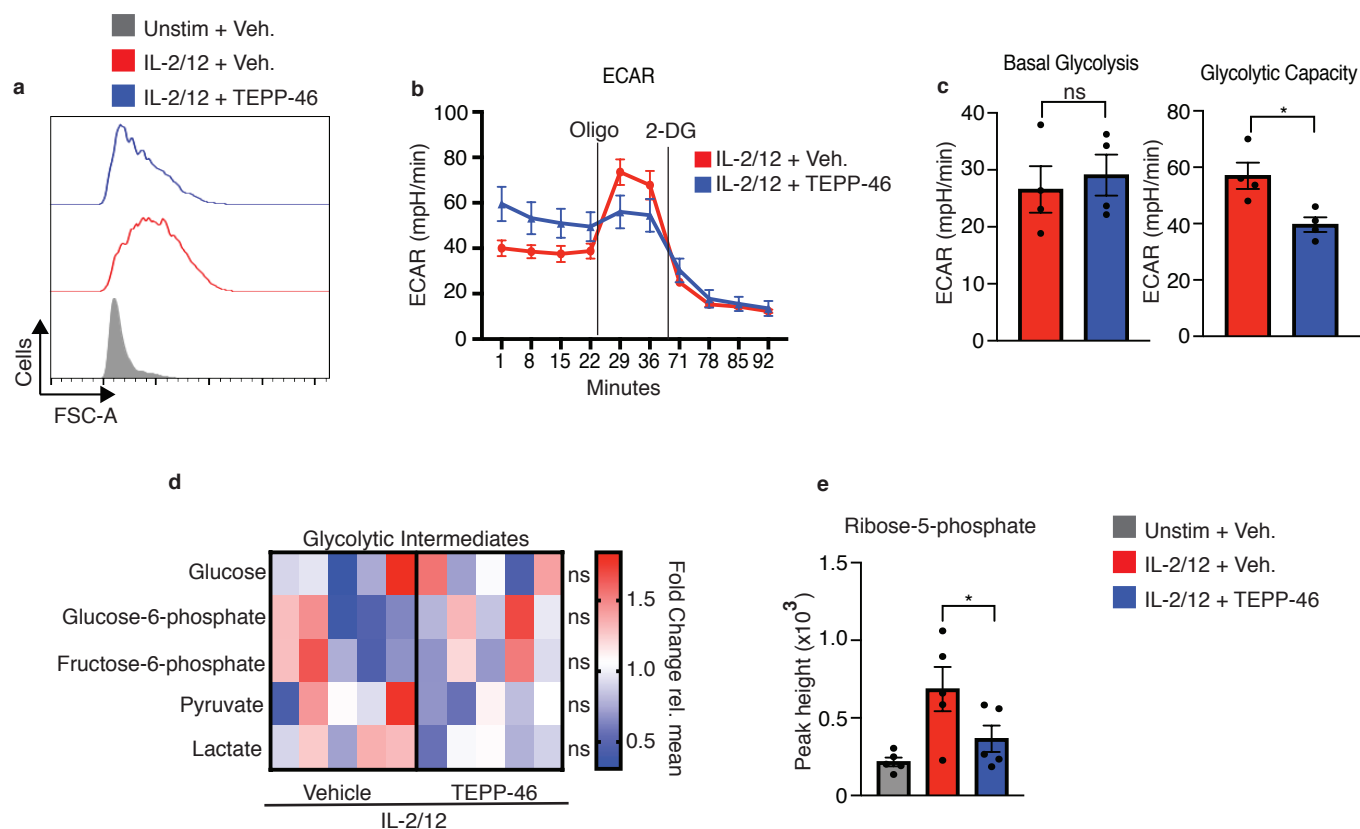



Figure 8

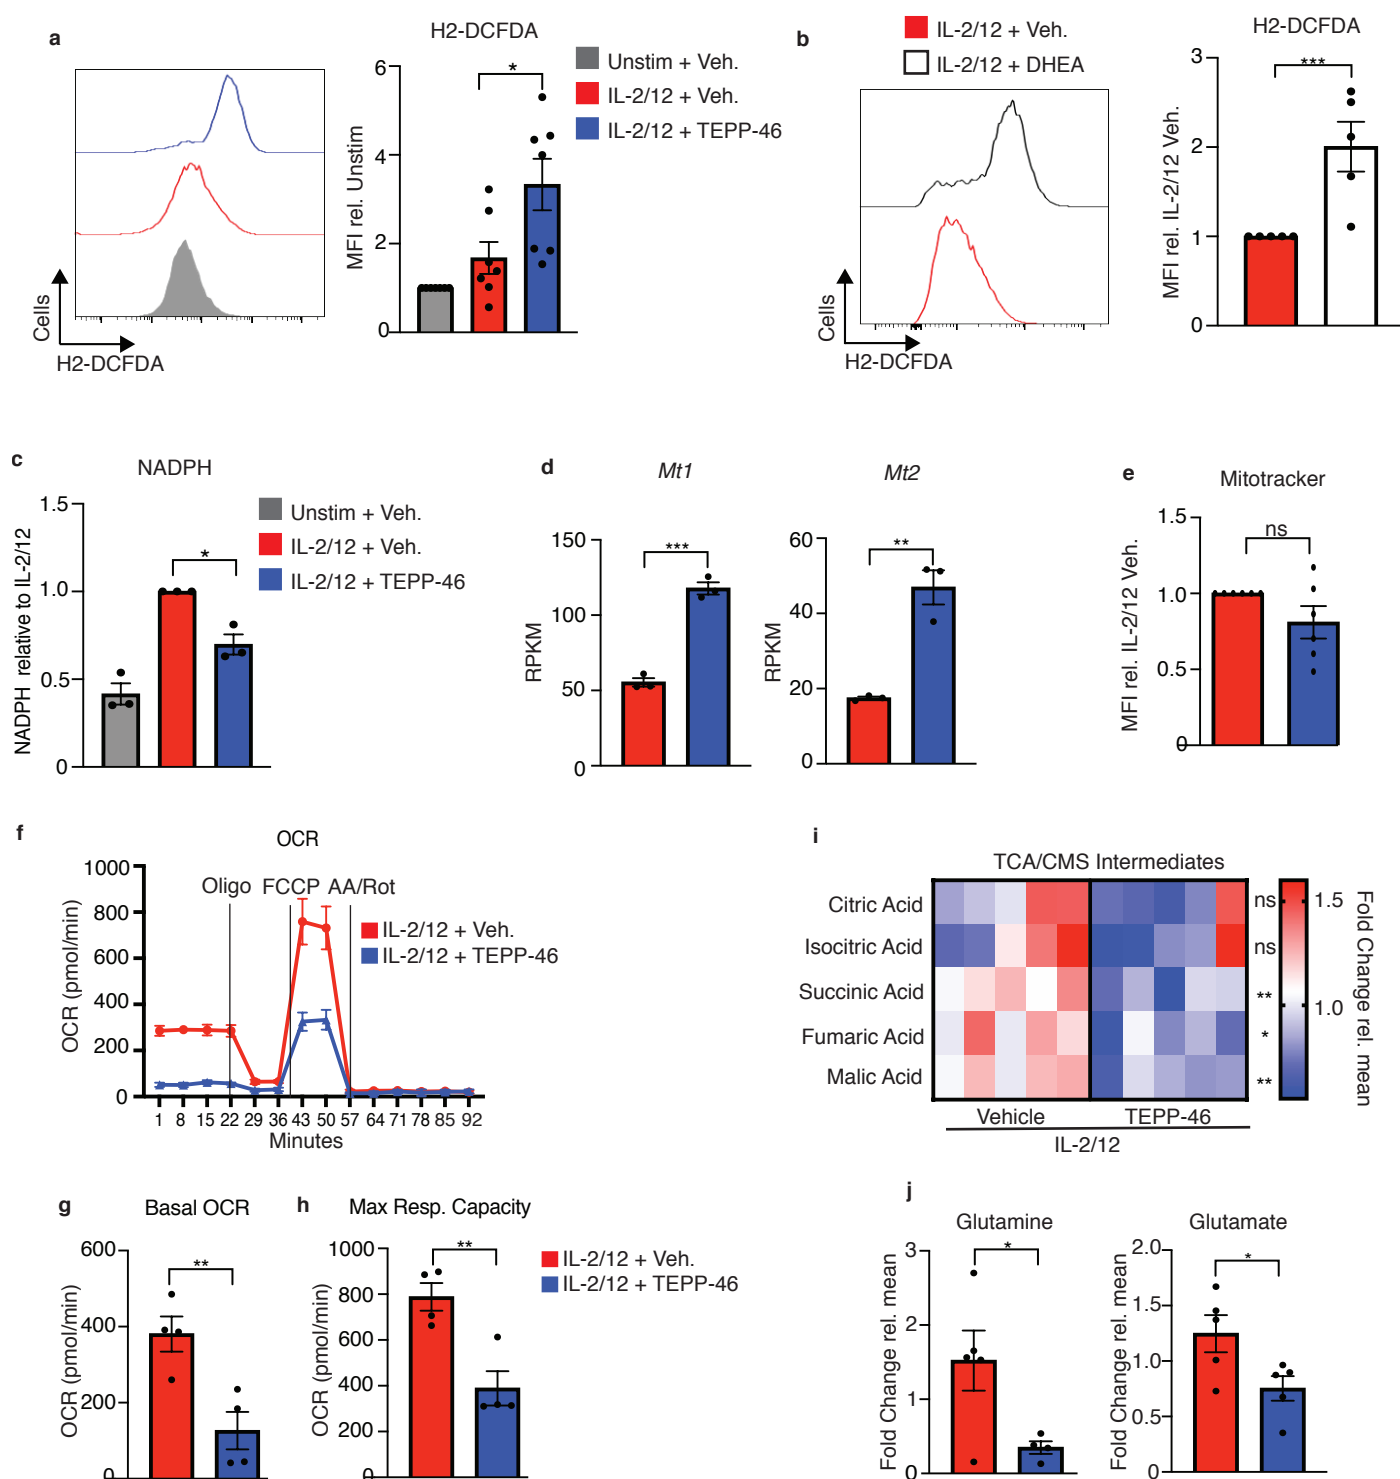

Source: https://biorxiv.org/content/10.1101/2020.06.15.152769v1.full.pdf
